# Supplementary material
Source: ML conference proceedings conference paper supplement (https://openreview.net/forum?id=BYIz5IIiql9)

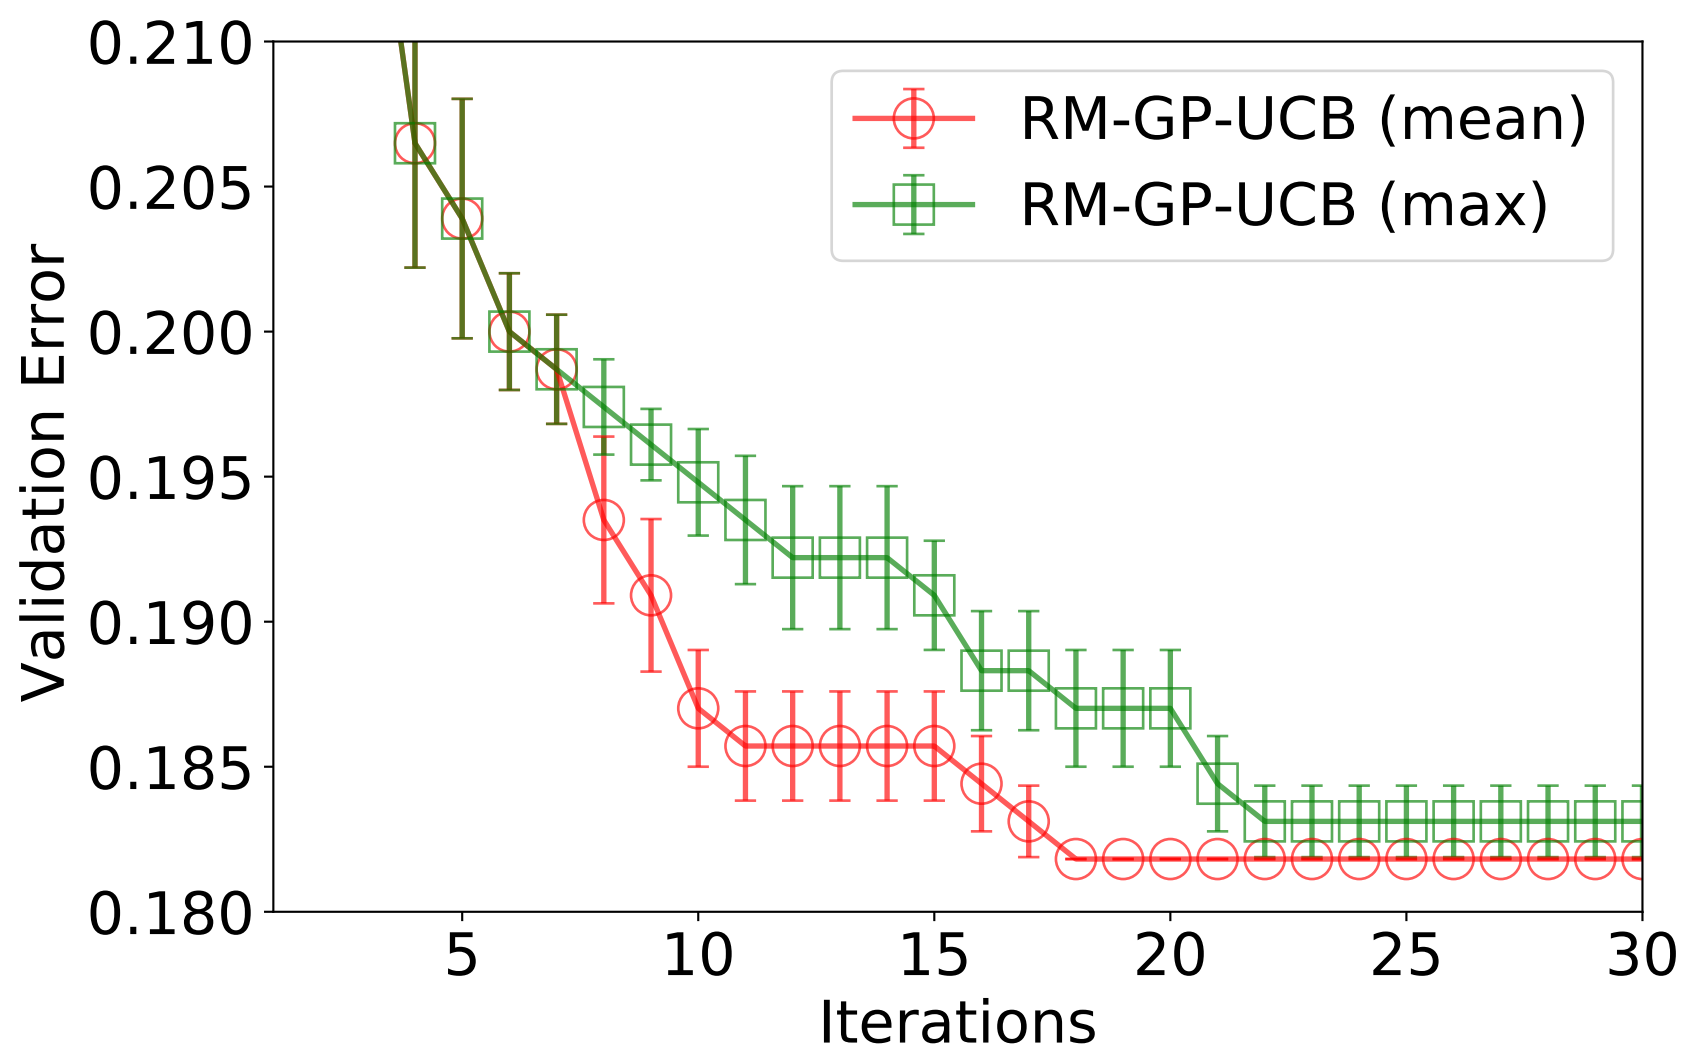

Supplement: supplementary_material [file attachment]

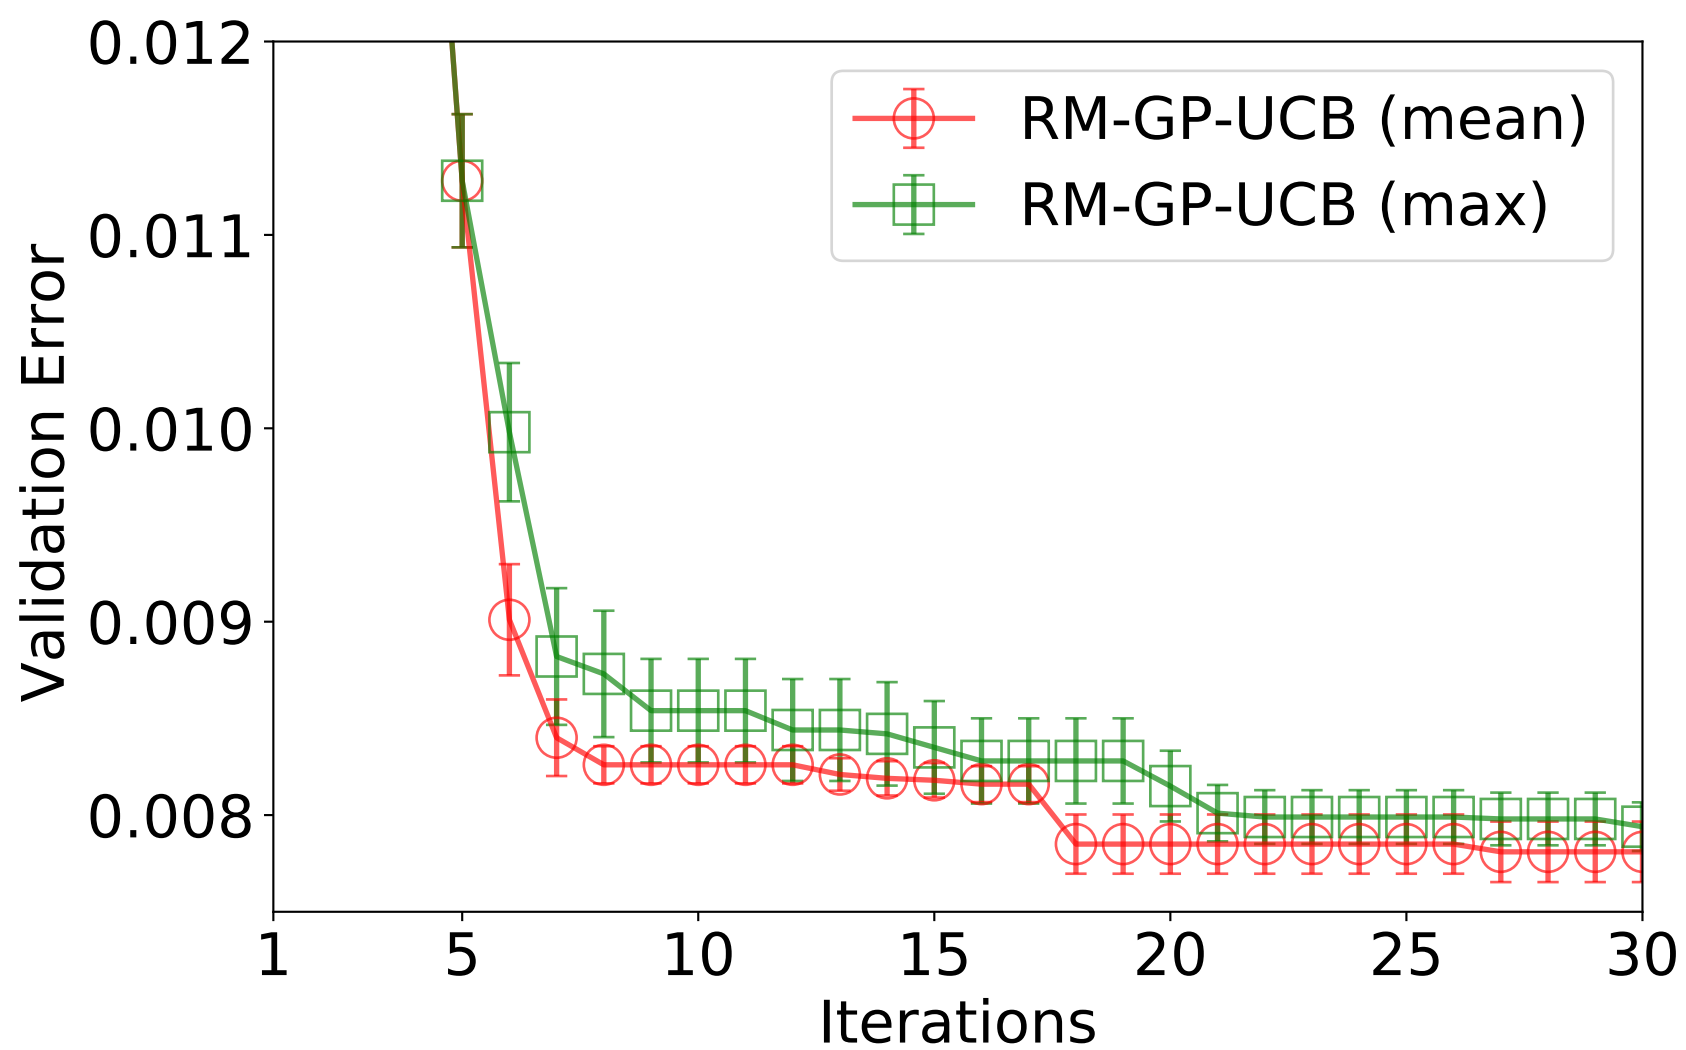

Supplement: supplementary_material [file attachment]

Validation Error

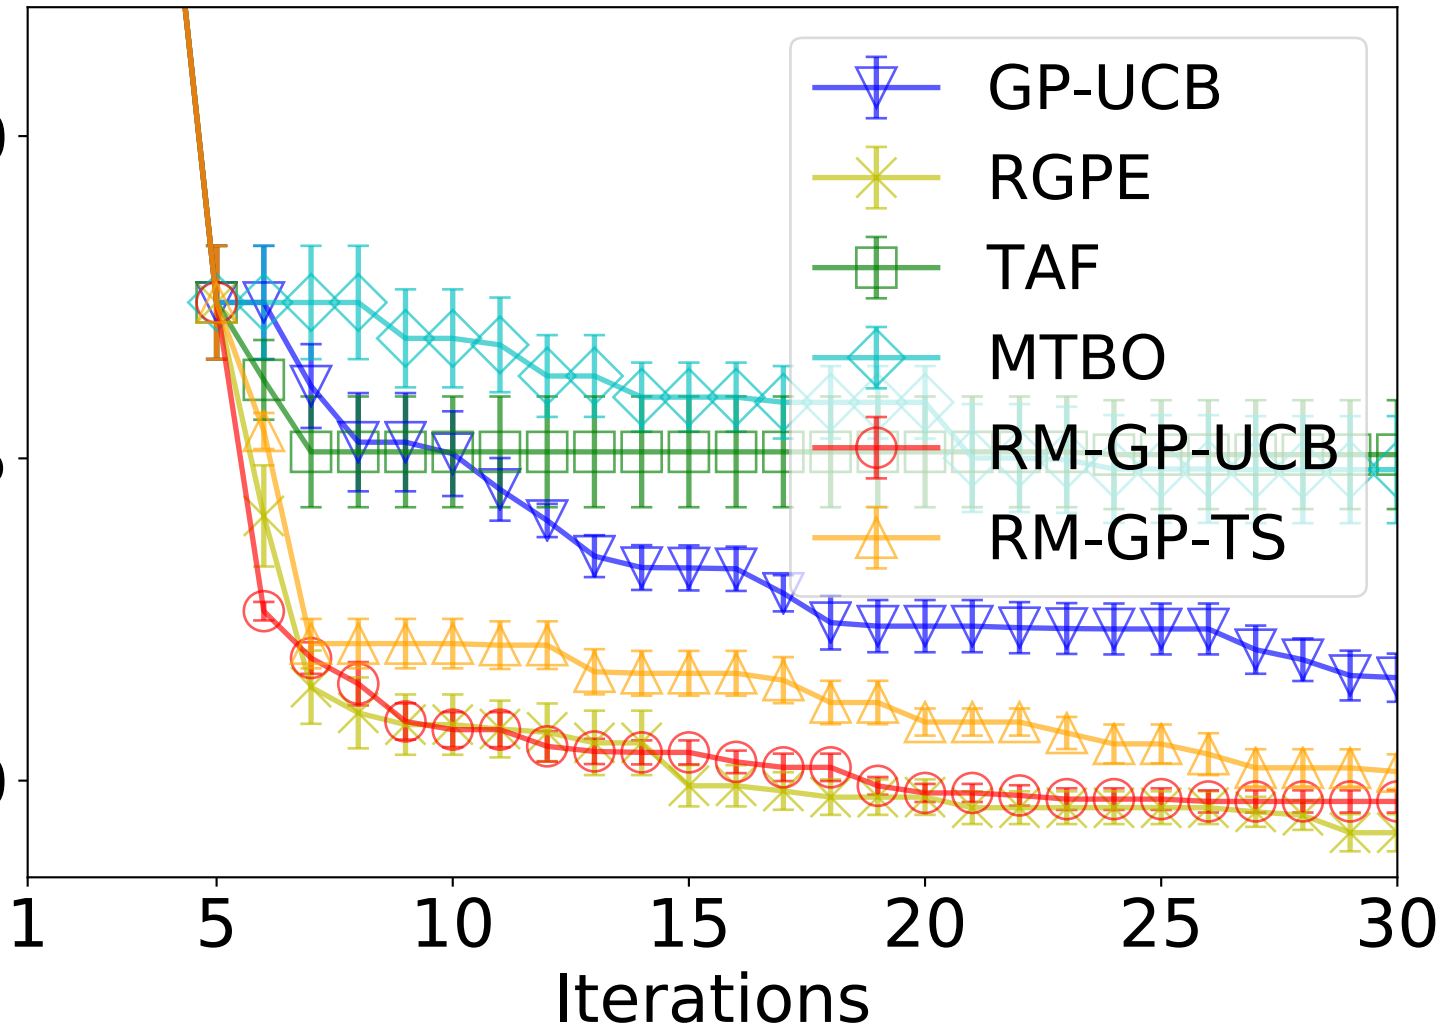

Supplement: supplementary_material [file attachment]

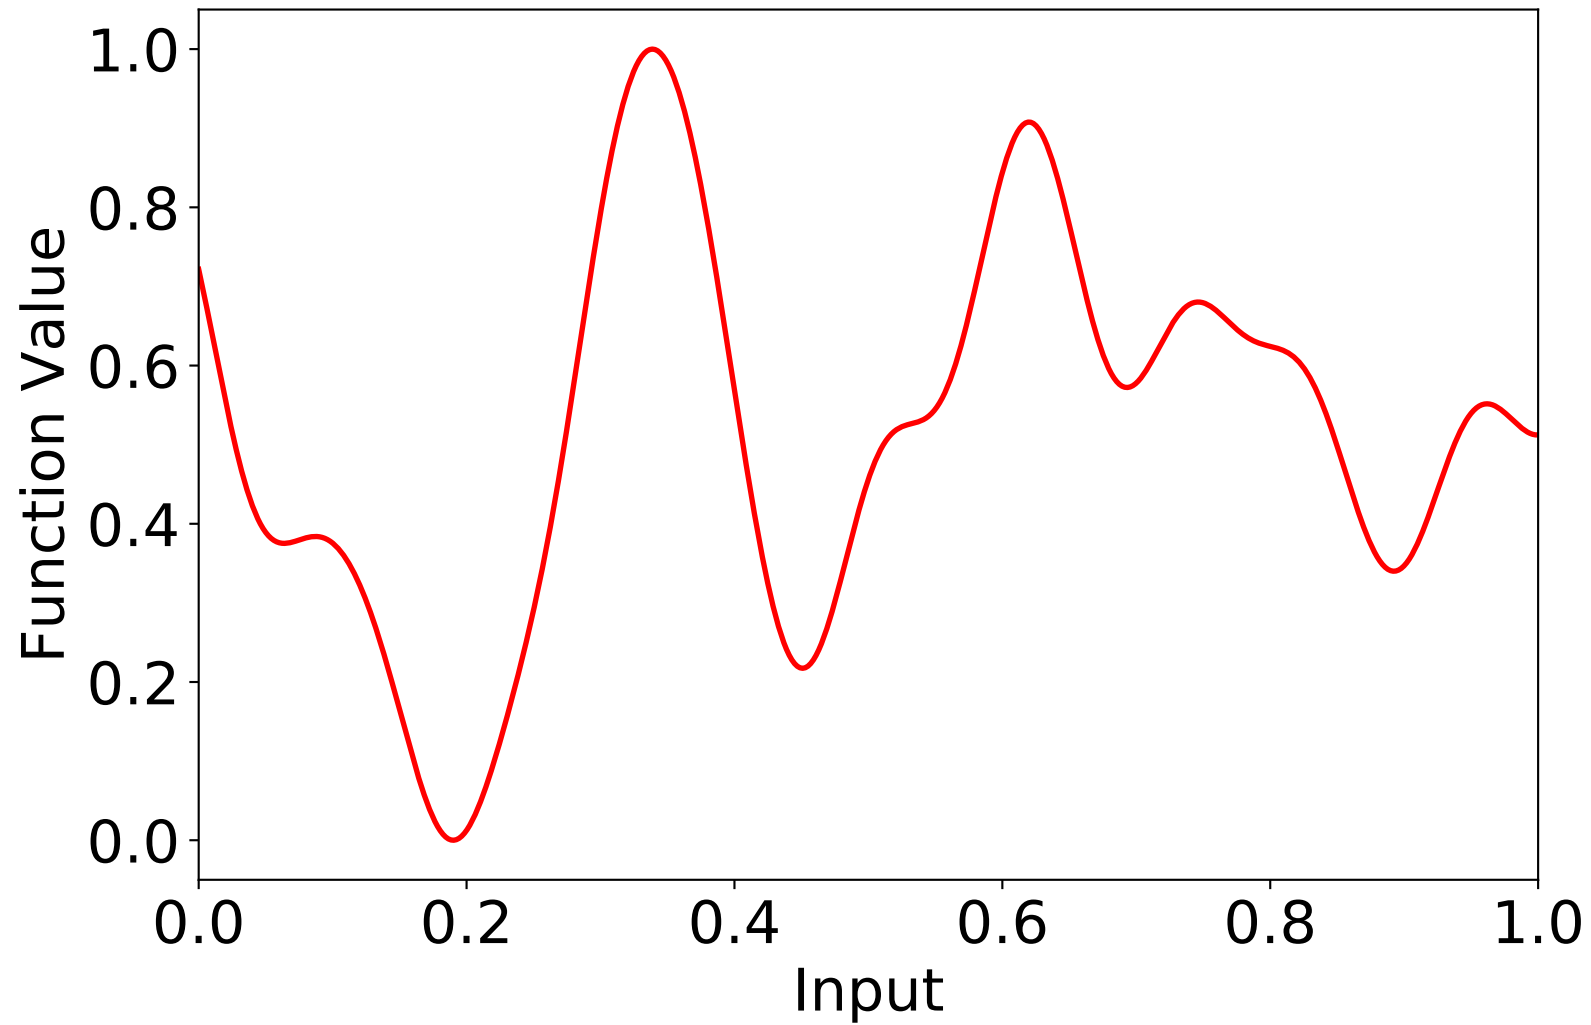

Supplement: supplementary_material [file attachment]

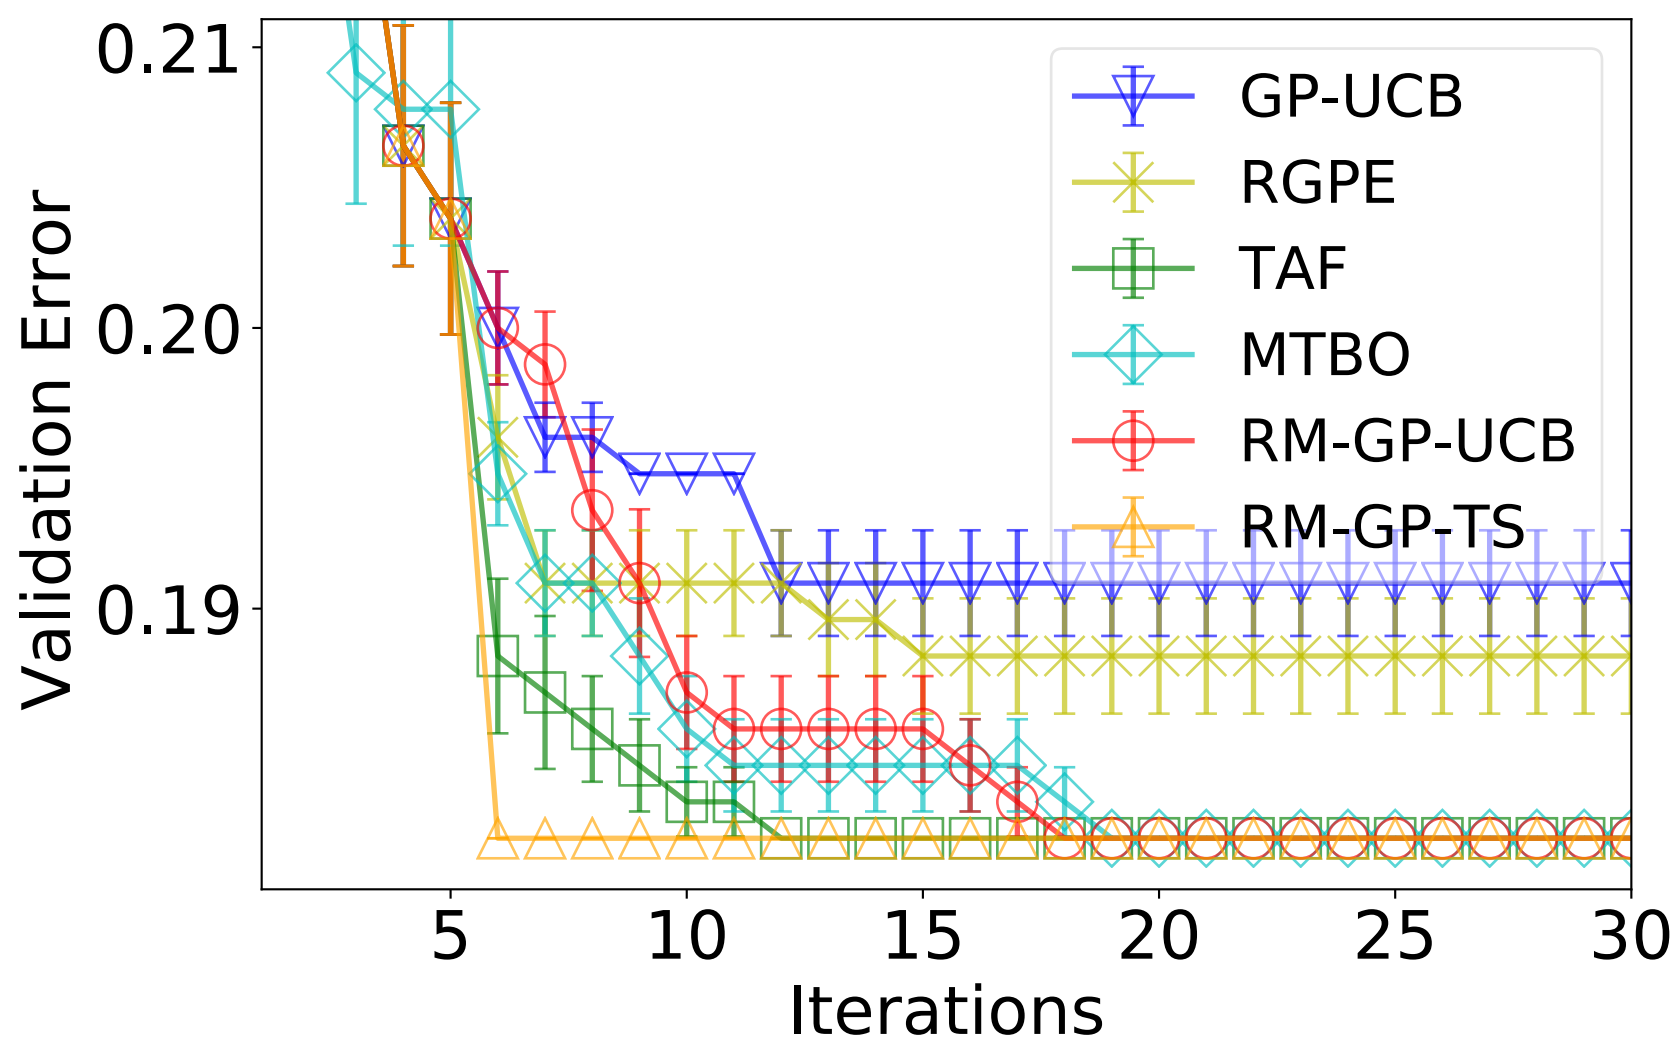

Supplement: supplementary_material [file attachment]

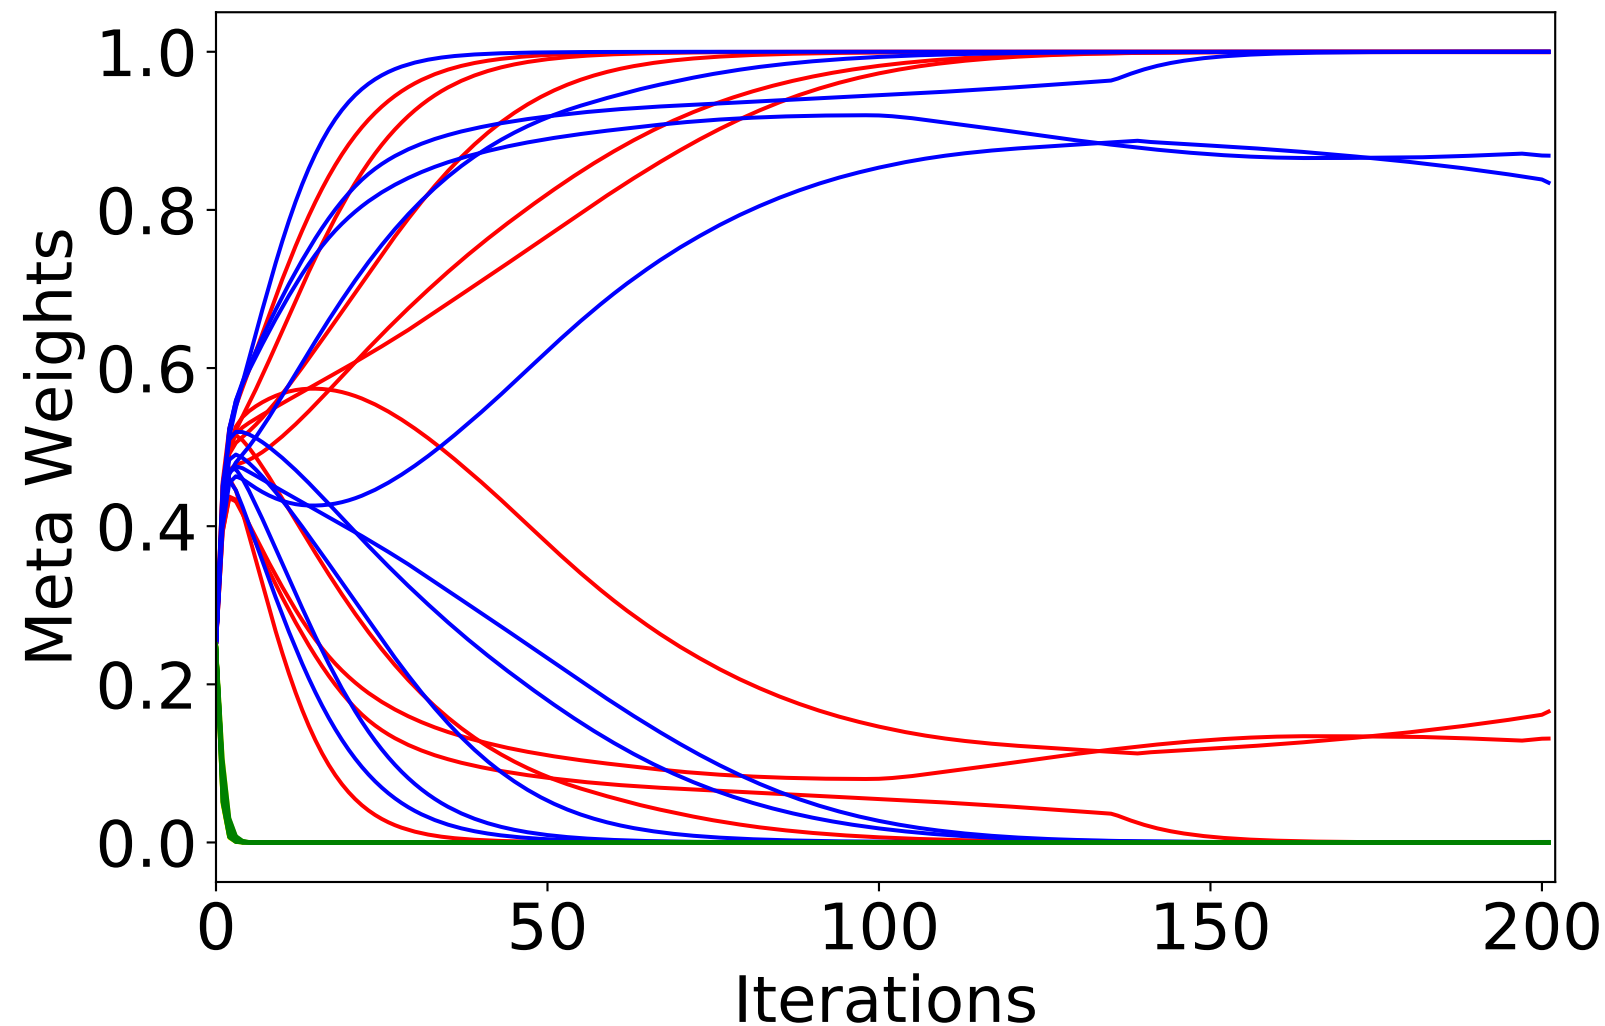

Supplement: supplementary_material [file attachment]

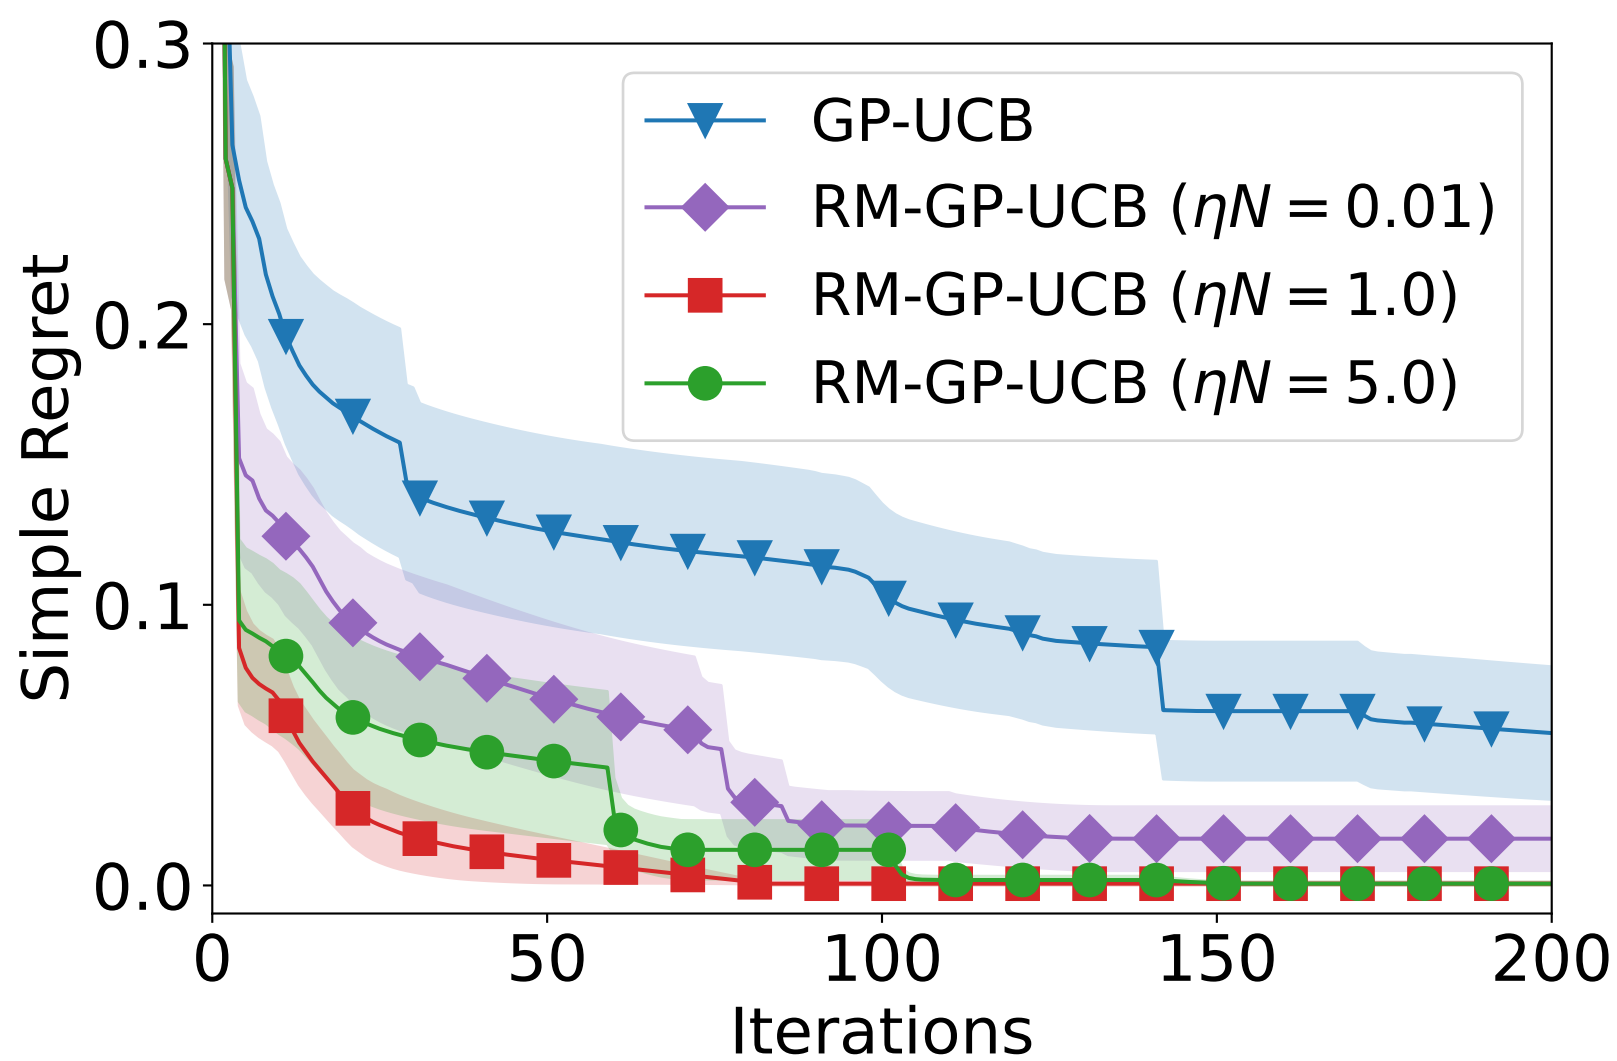

Supplement: supplementary_material [file attachment]

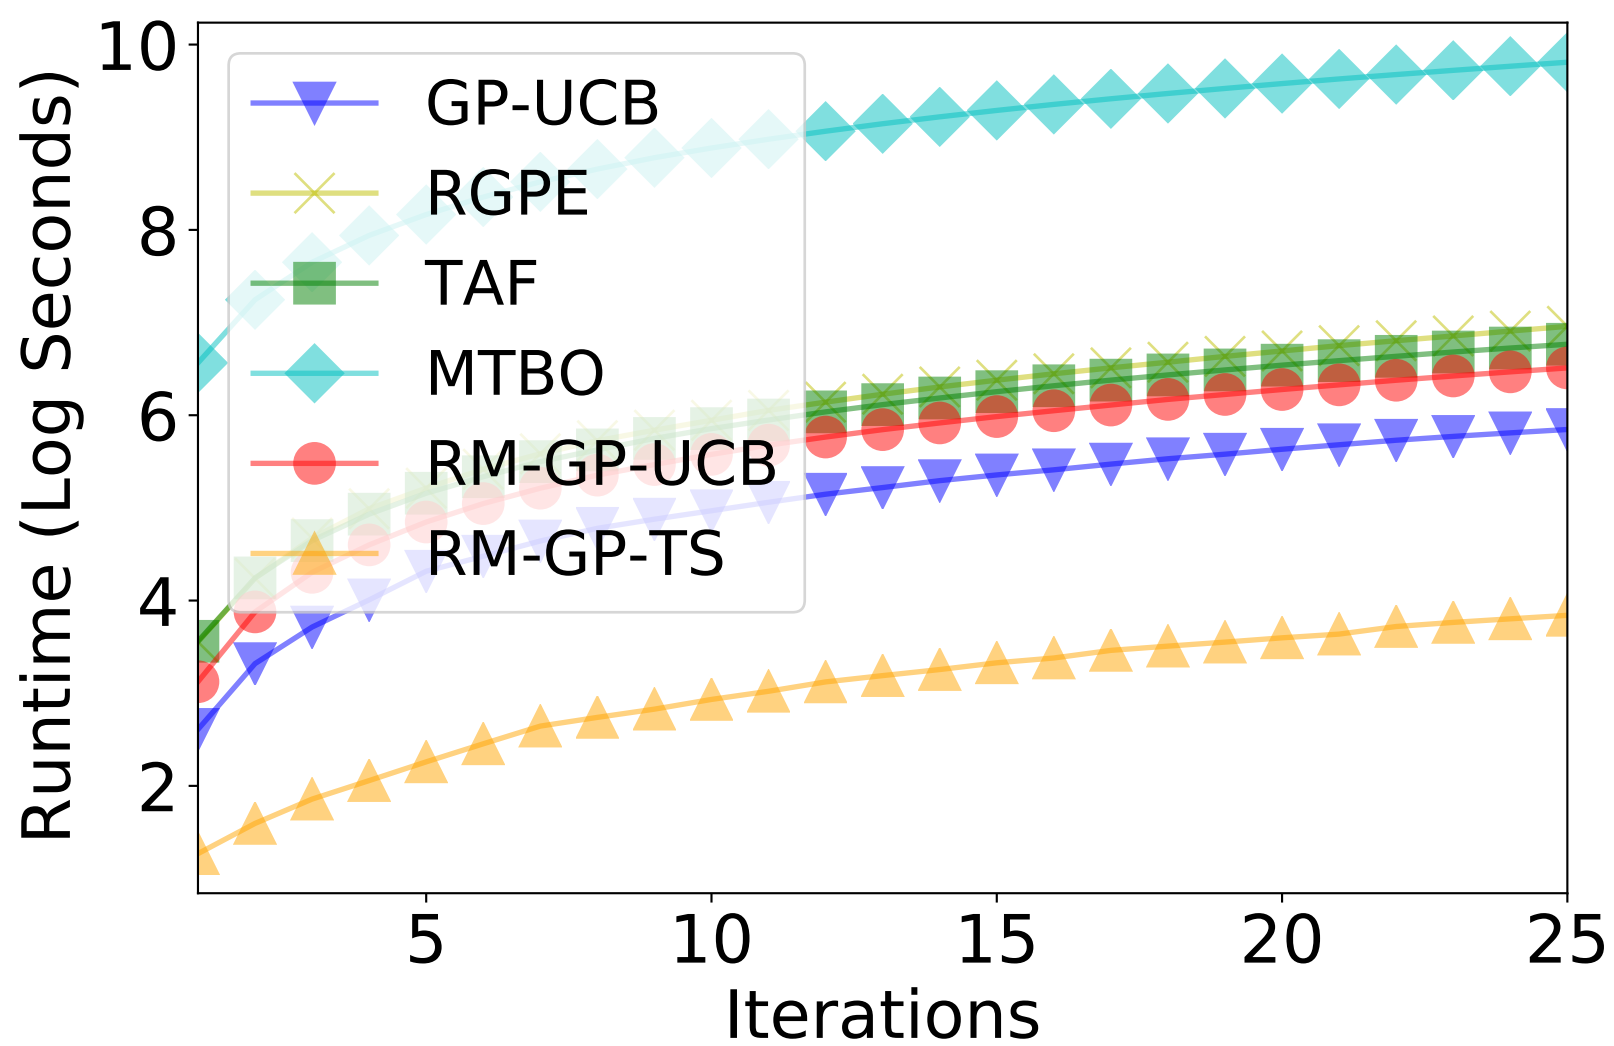

Supplement: supplementary_material [file attachment]

Validation Error

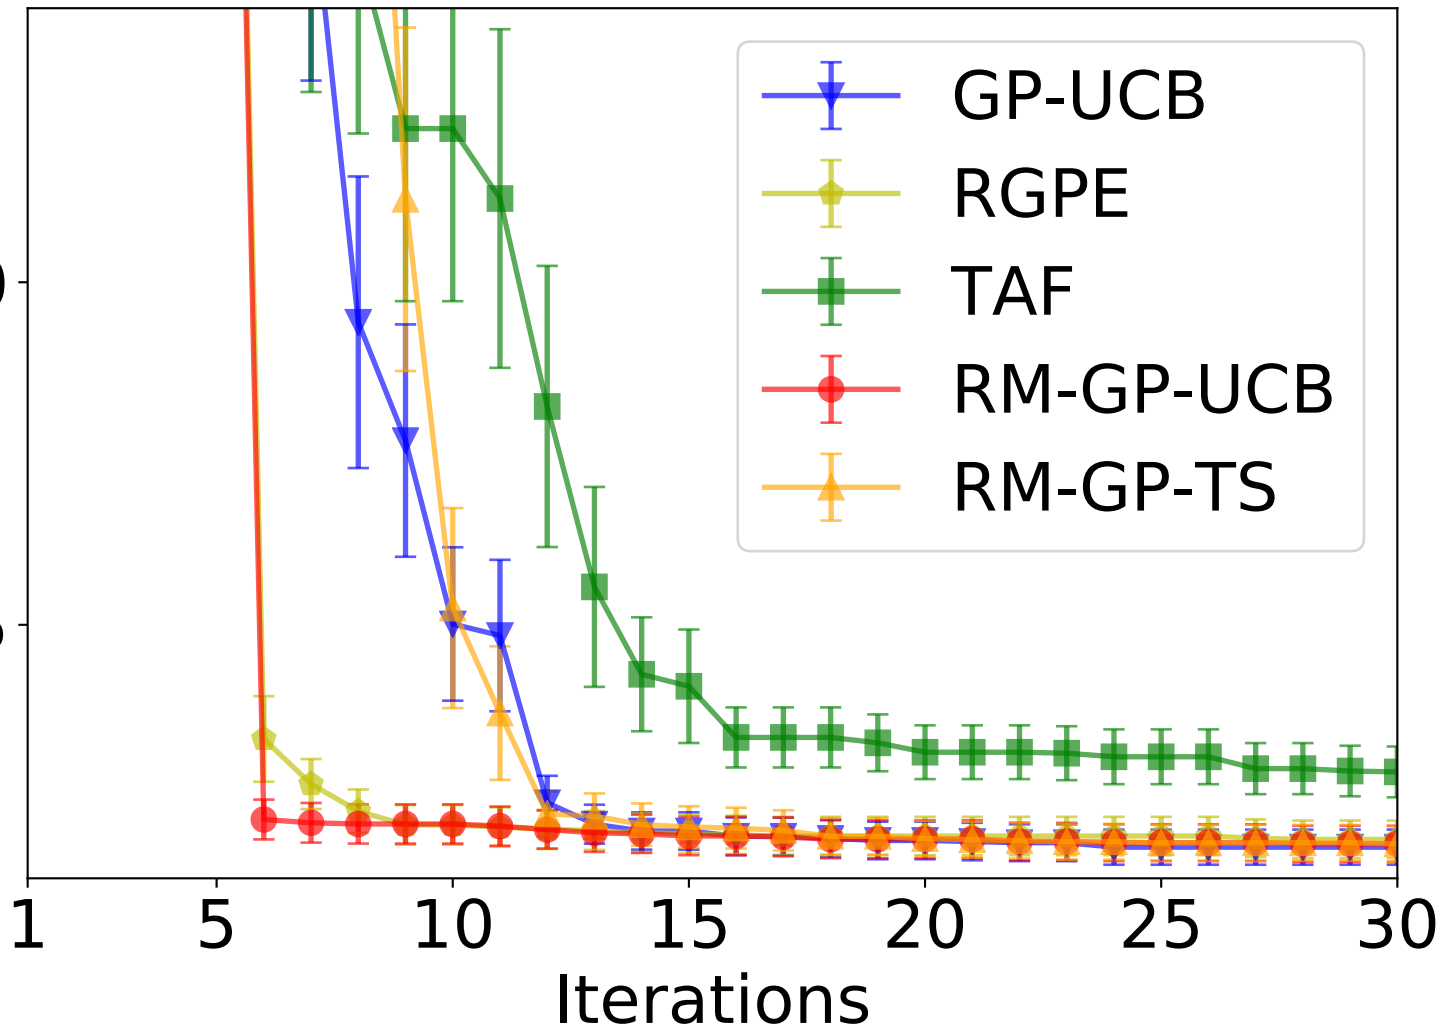

Supplement: supplementary_material [file attachment]

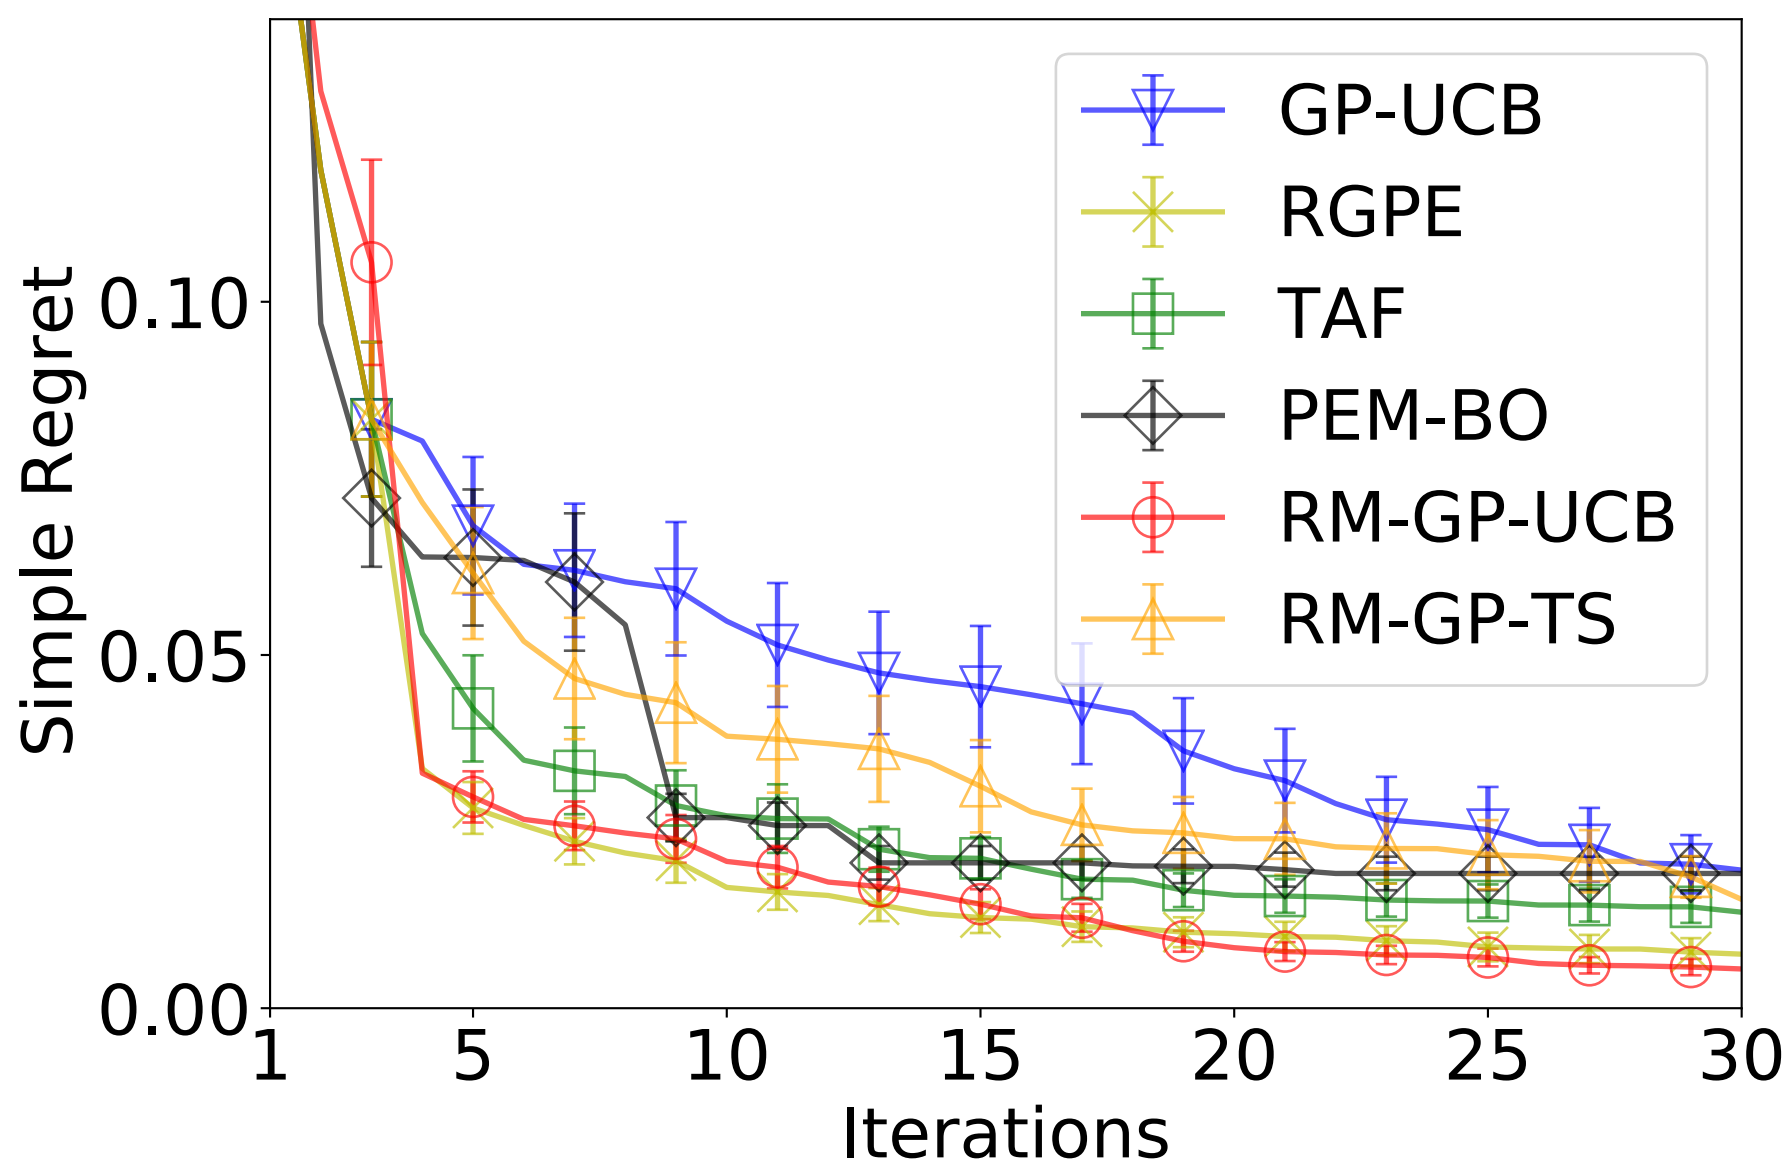

Supplement: supplementary_material [file attachment]

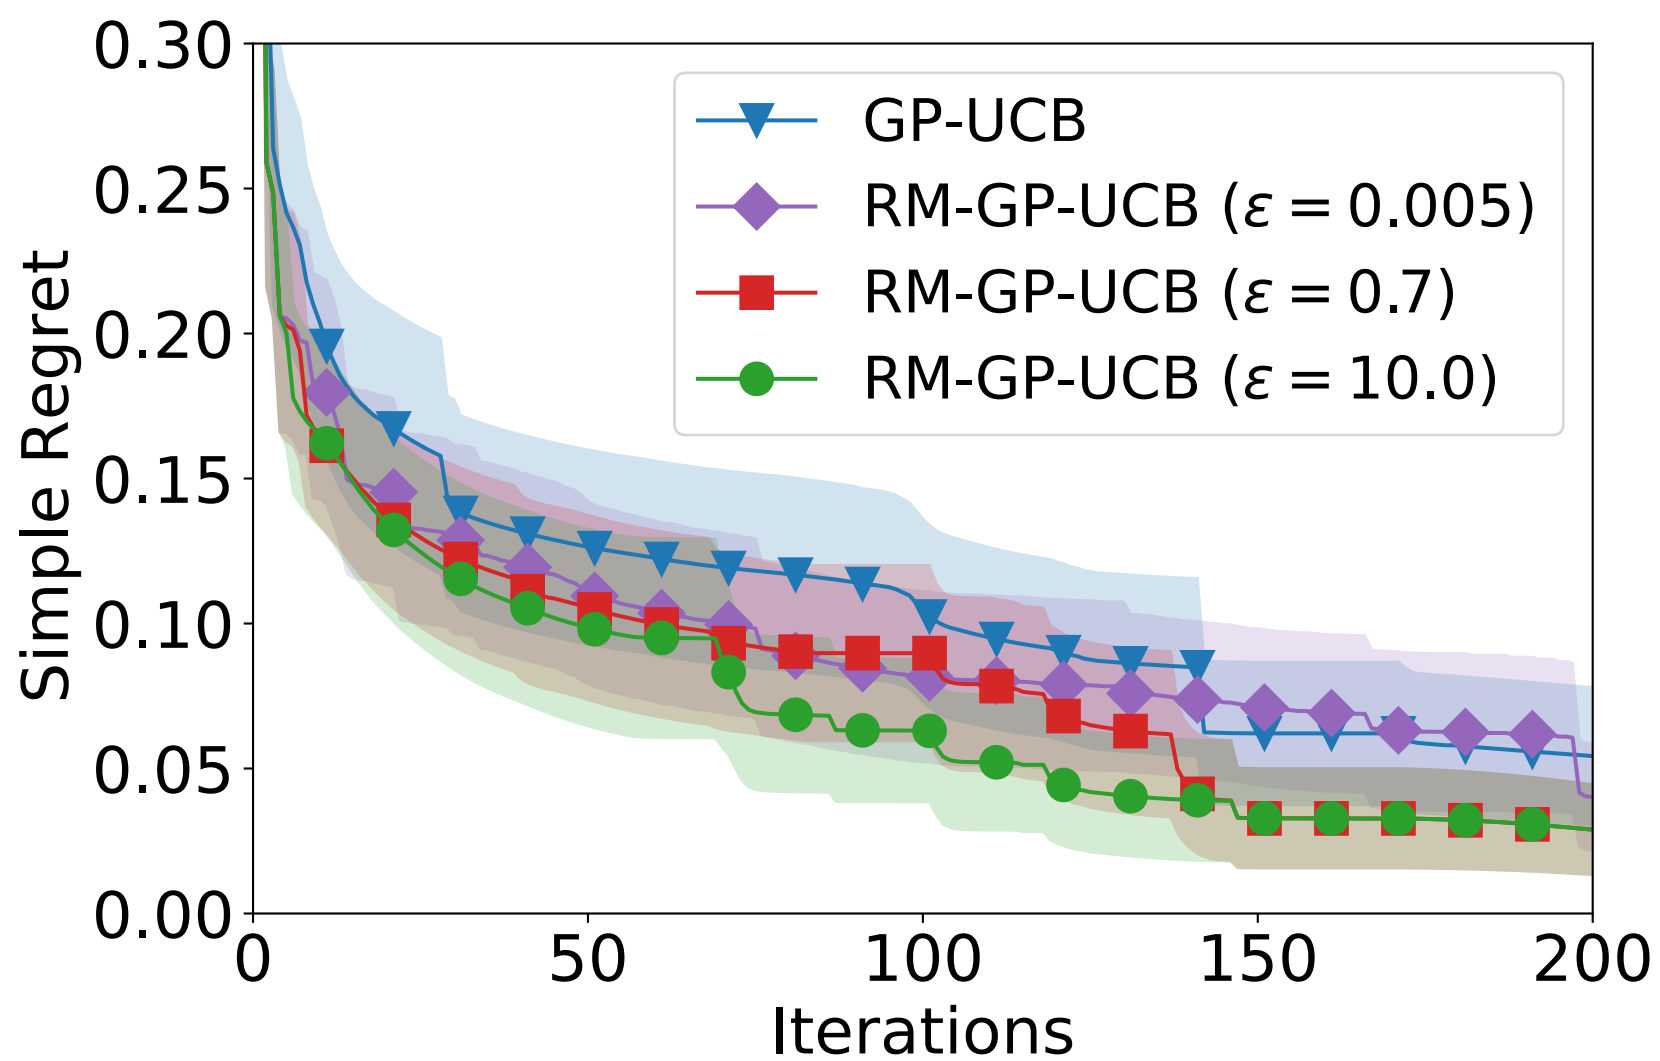

Supplement: supplementary_material [file attachment]

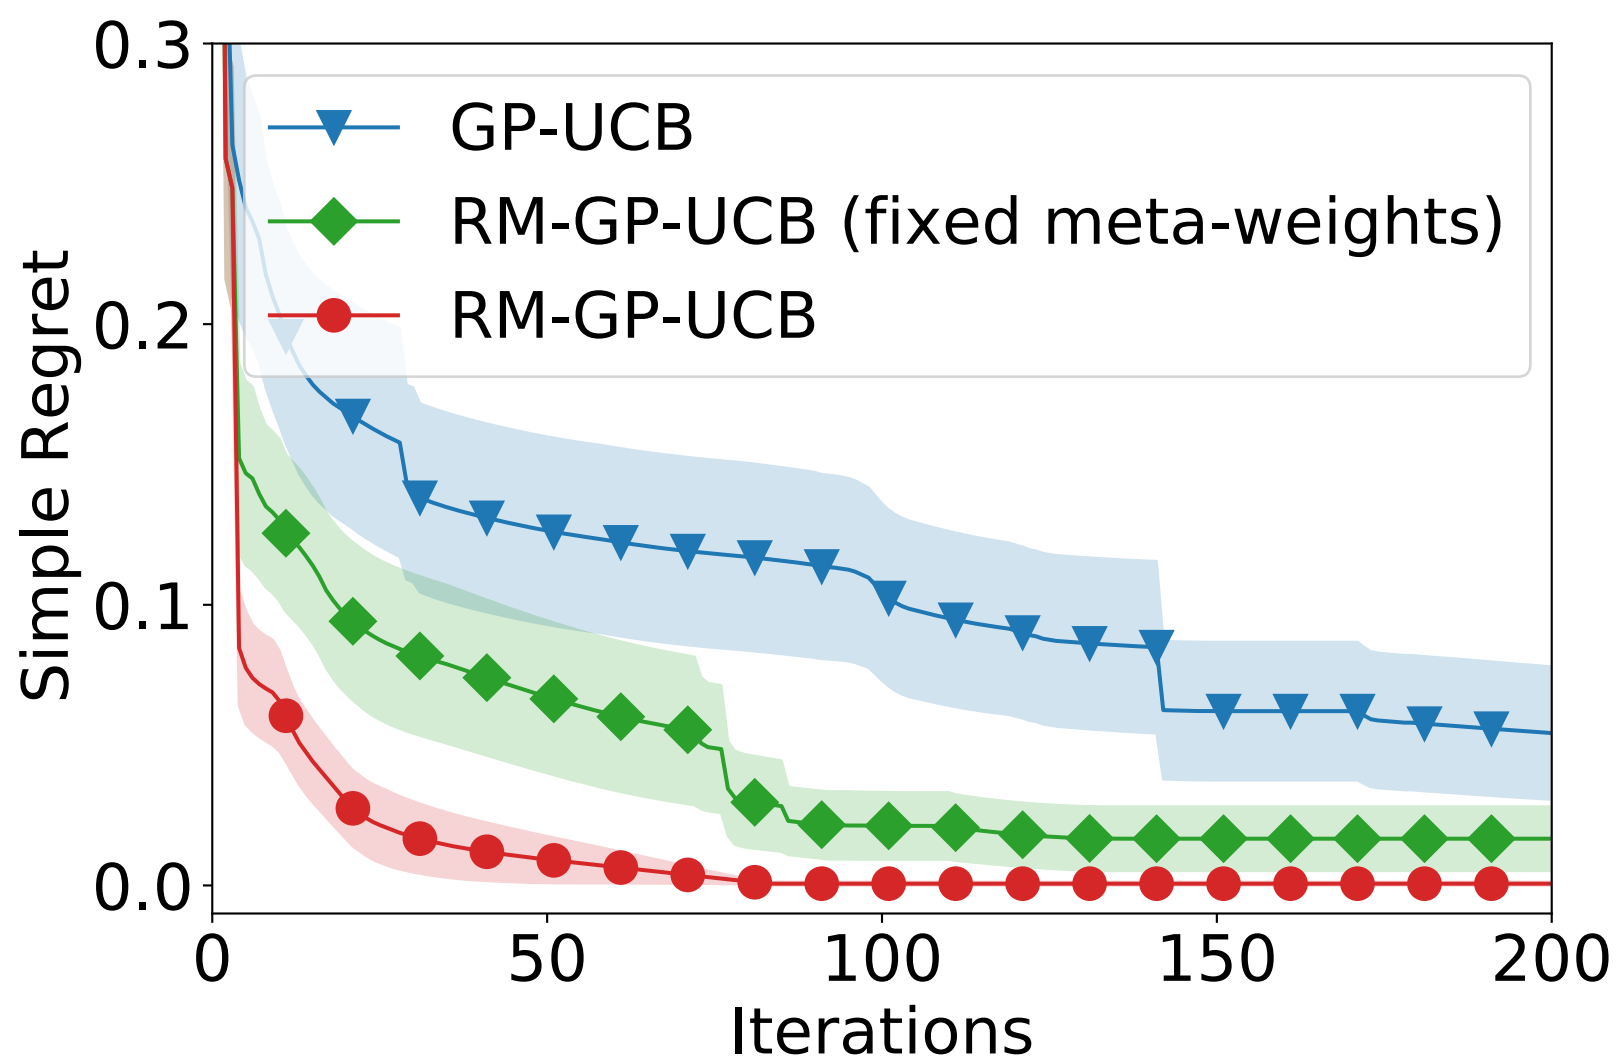

Supplement: supplementary_material [file attachment]

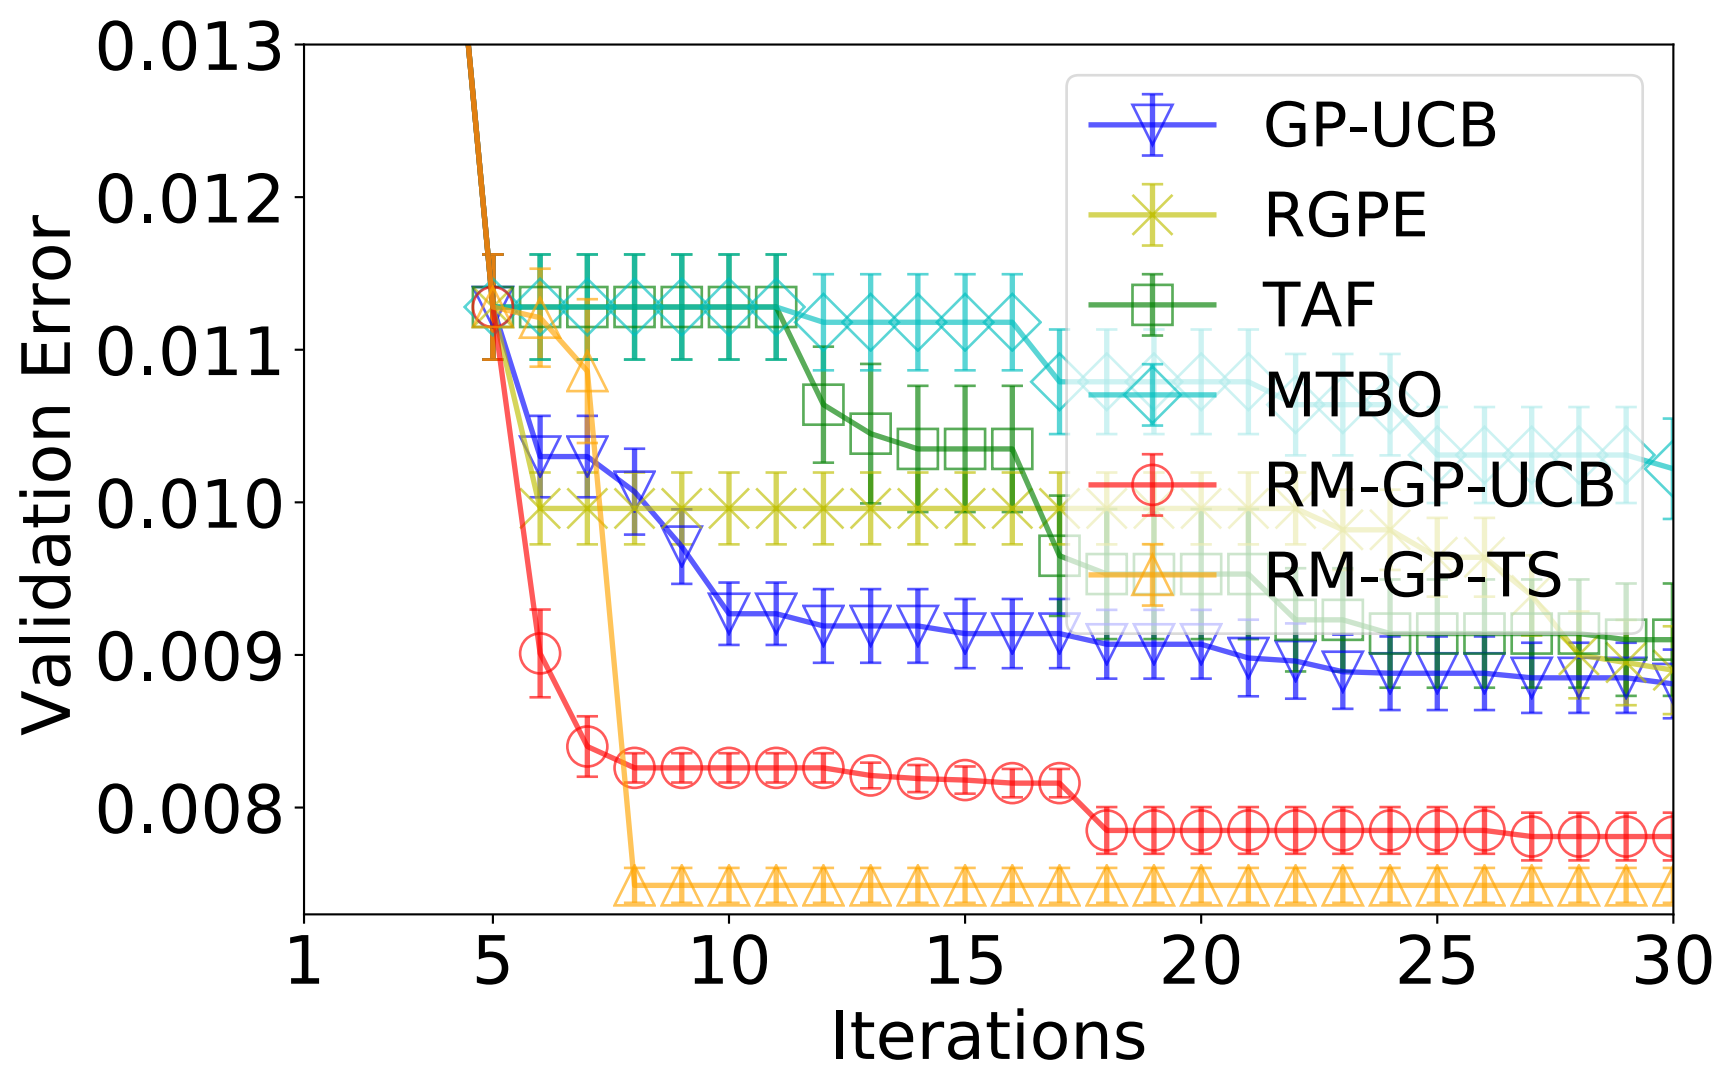

Supplement: supplementary_material [file attachment]

# Runtime Comparison (RL)

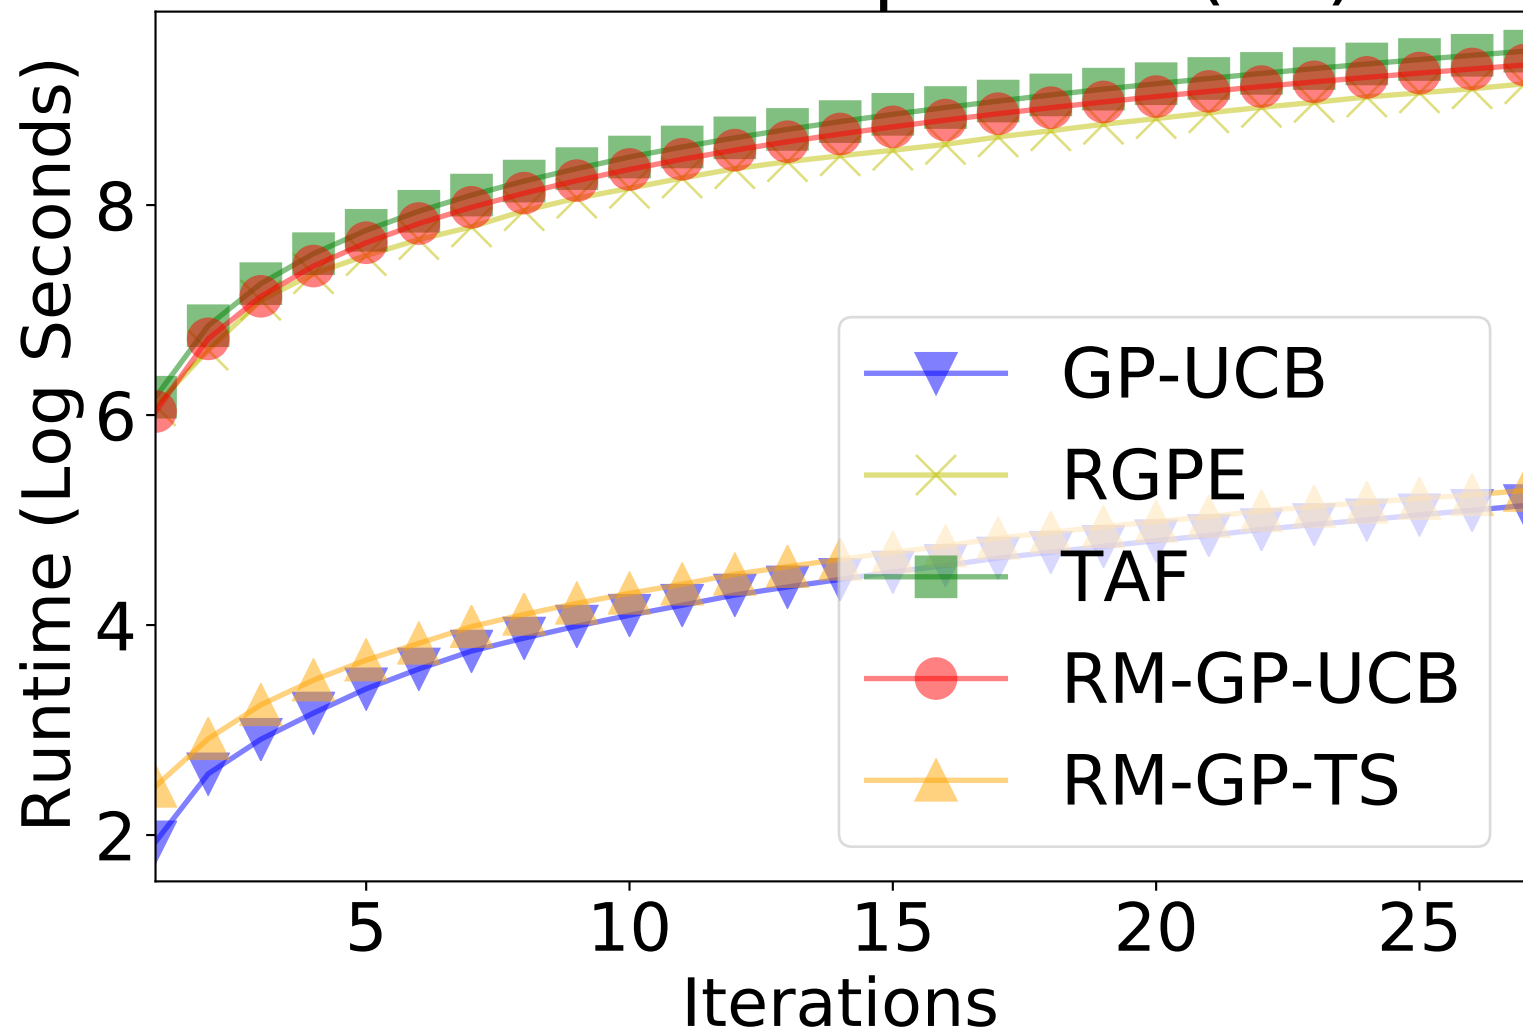

Supplement: supplementary_material [file attachment]

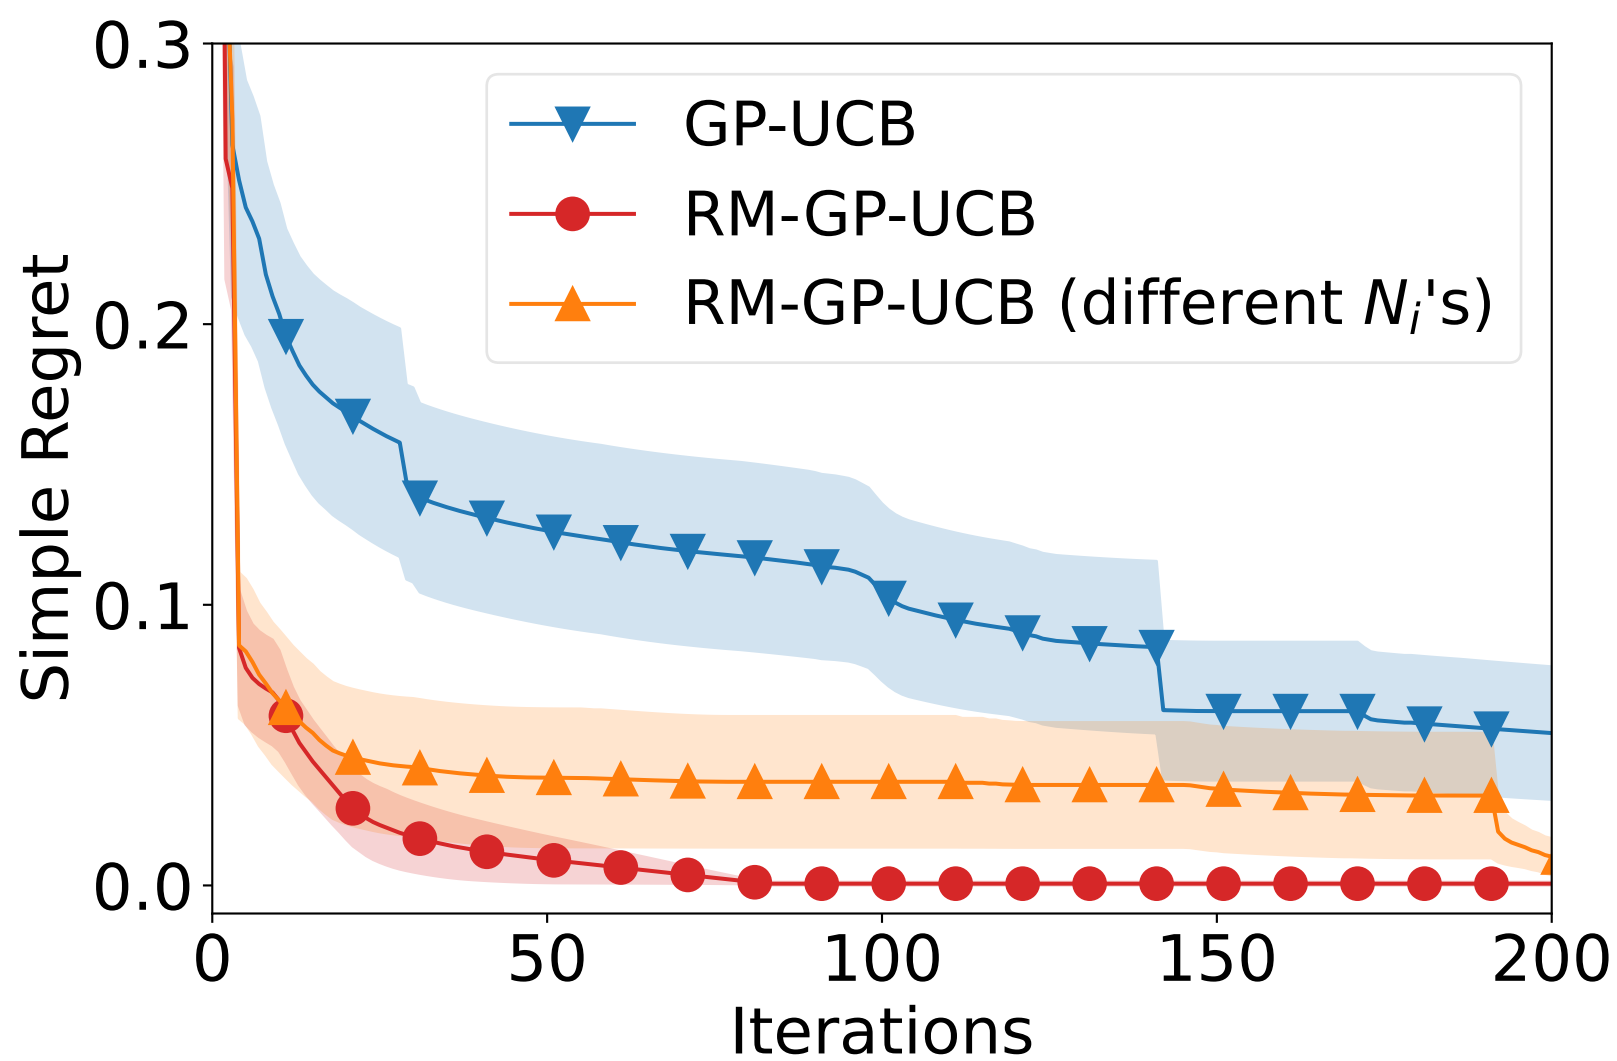

Supplement: supplementary_material [file attachment]

Meta-Weights

0.6

0.4

0.2

0.0

0

50

100

150

200

Iterations

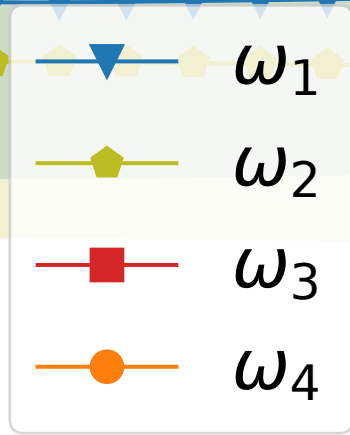

$\omega_1$

$\omega_2$

$\omega_3$

$\omega_4$

Supplement: supplementary_material [file attachment]

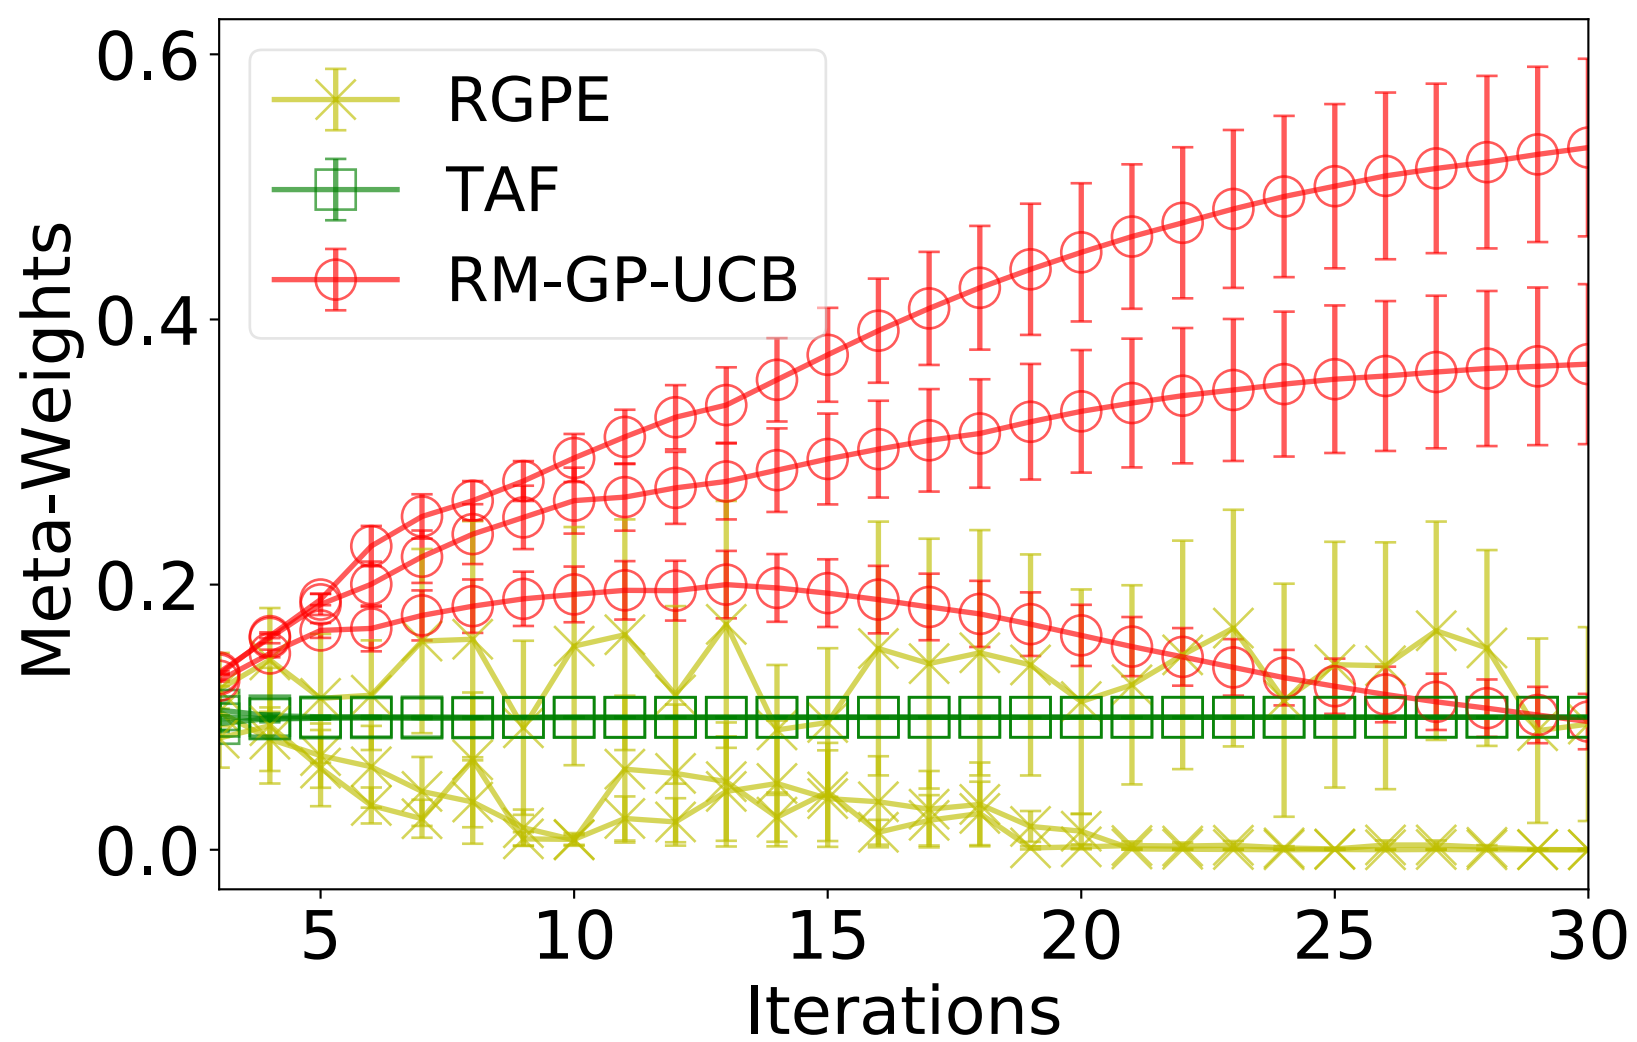

Supplement: supplementary_material [file attachment]

Cumulative Rewards

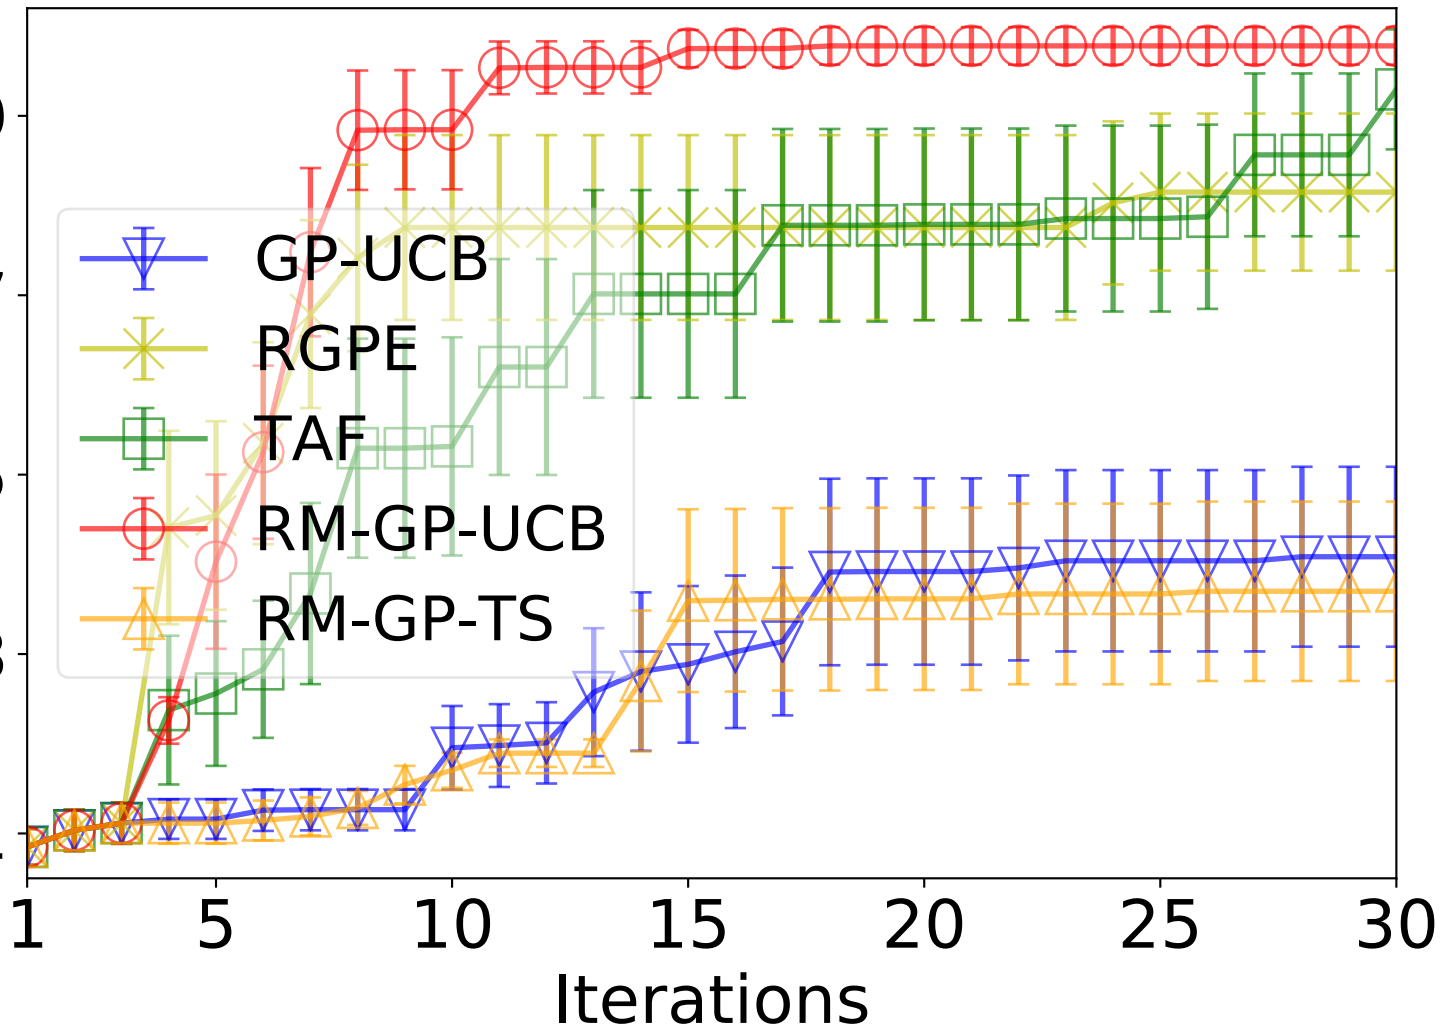

Supplement: supplementary_material [file attachment]

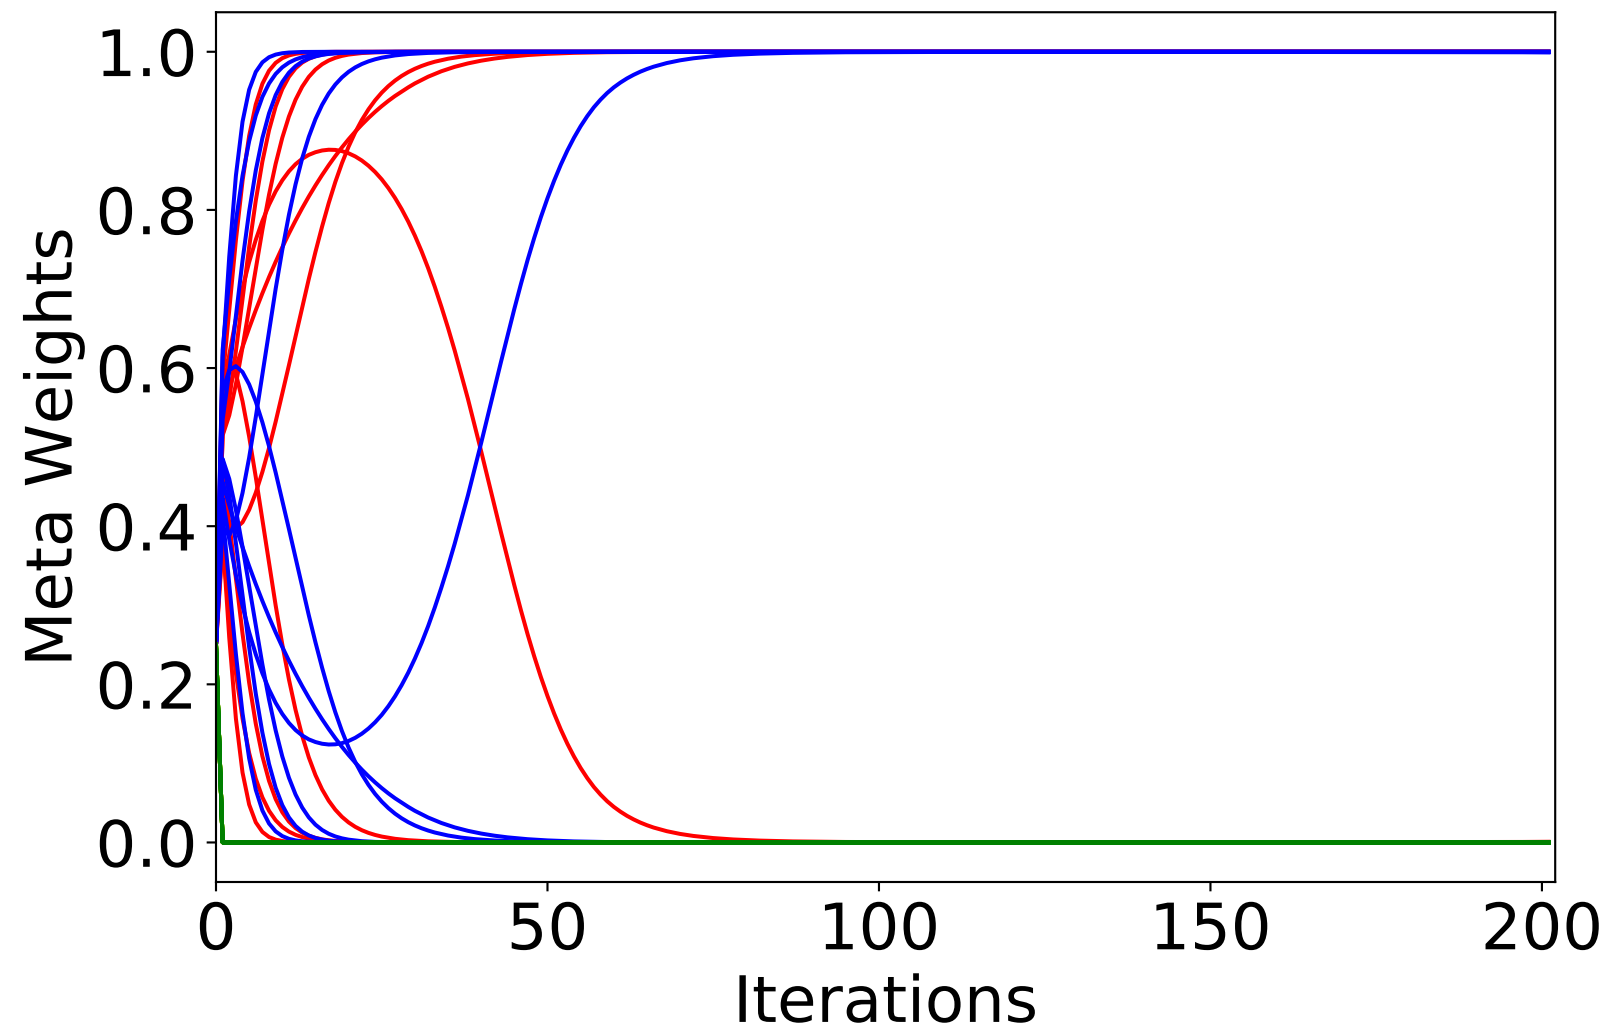

Supplement: supplementary_material [file attachment]

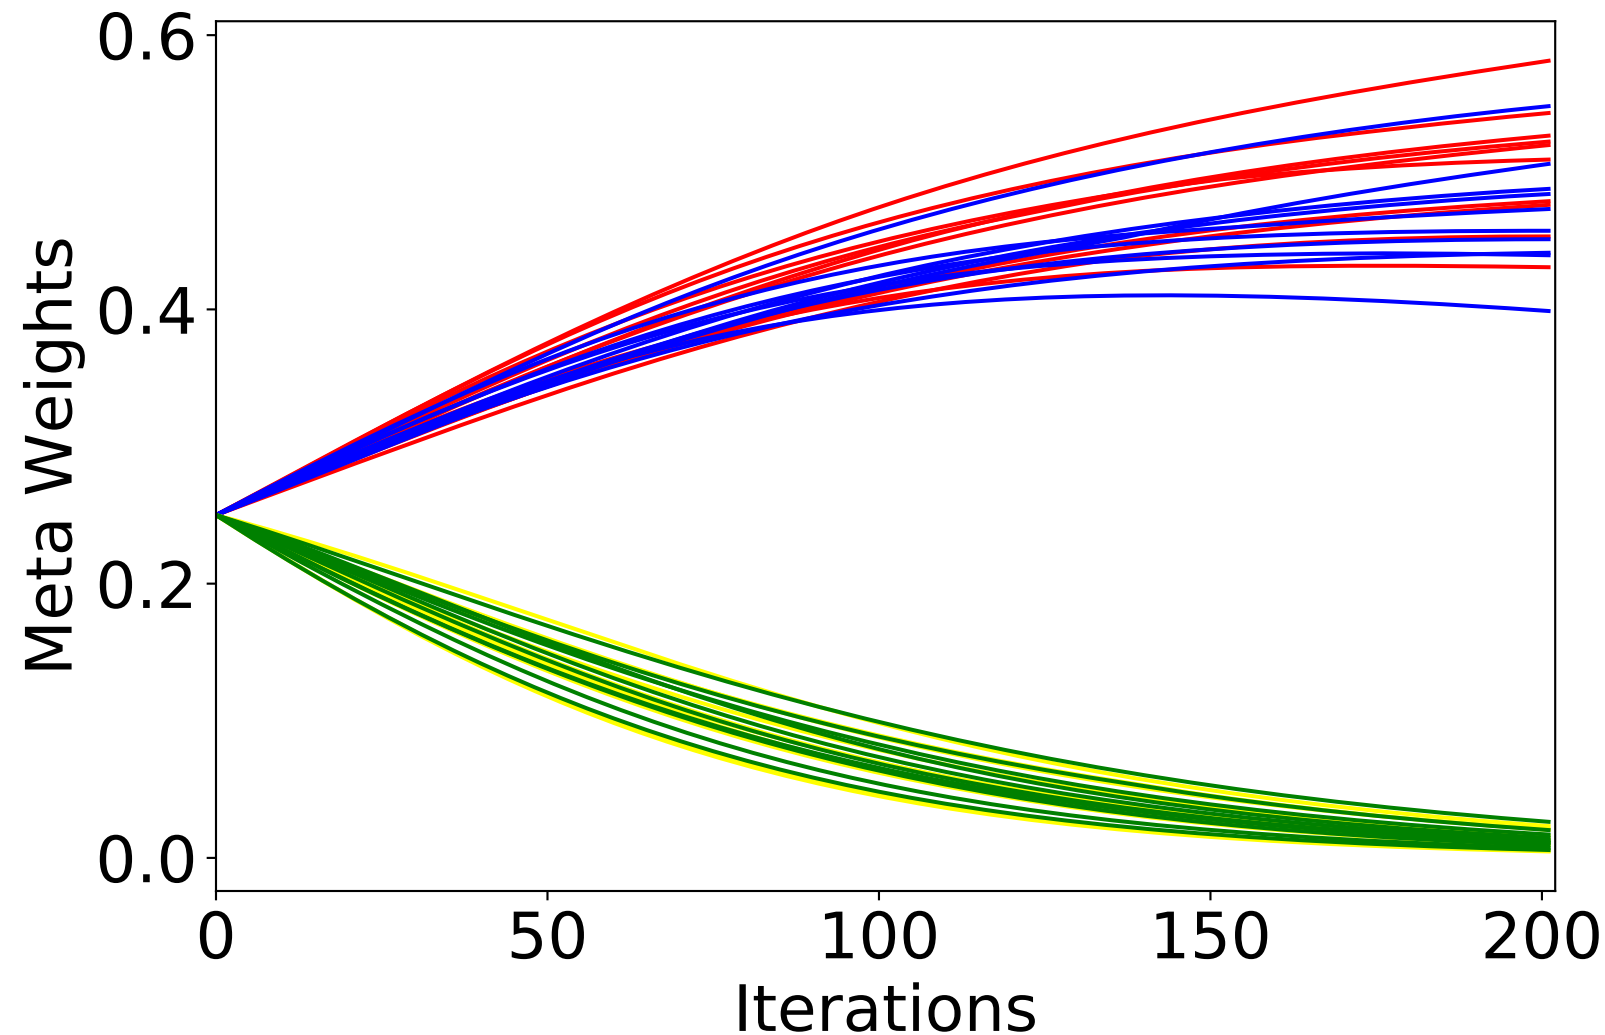

Supplement: supplementary_material [file attachment]

Validation Error

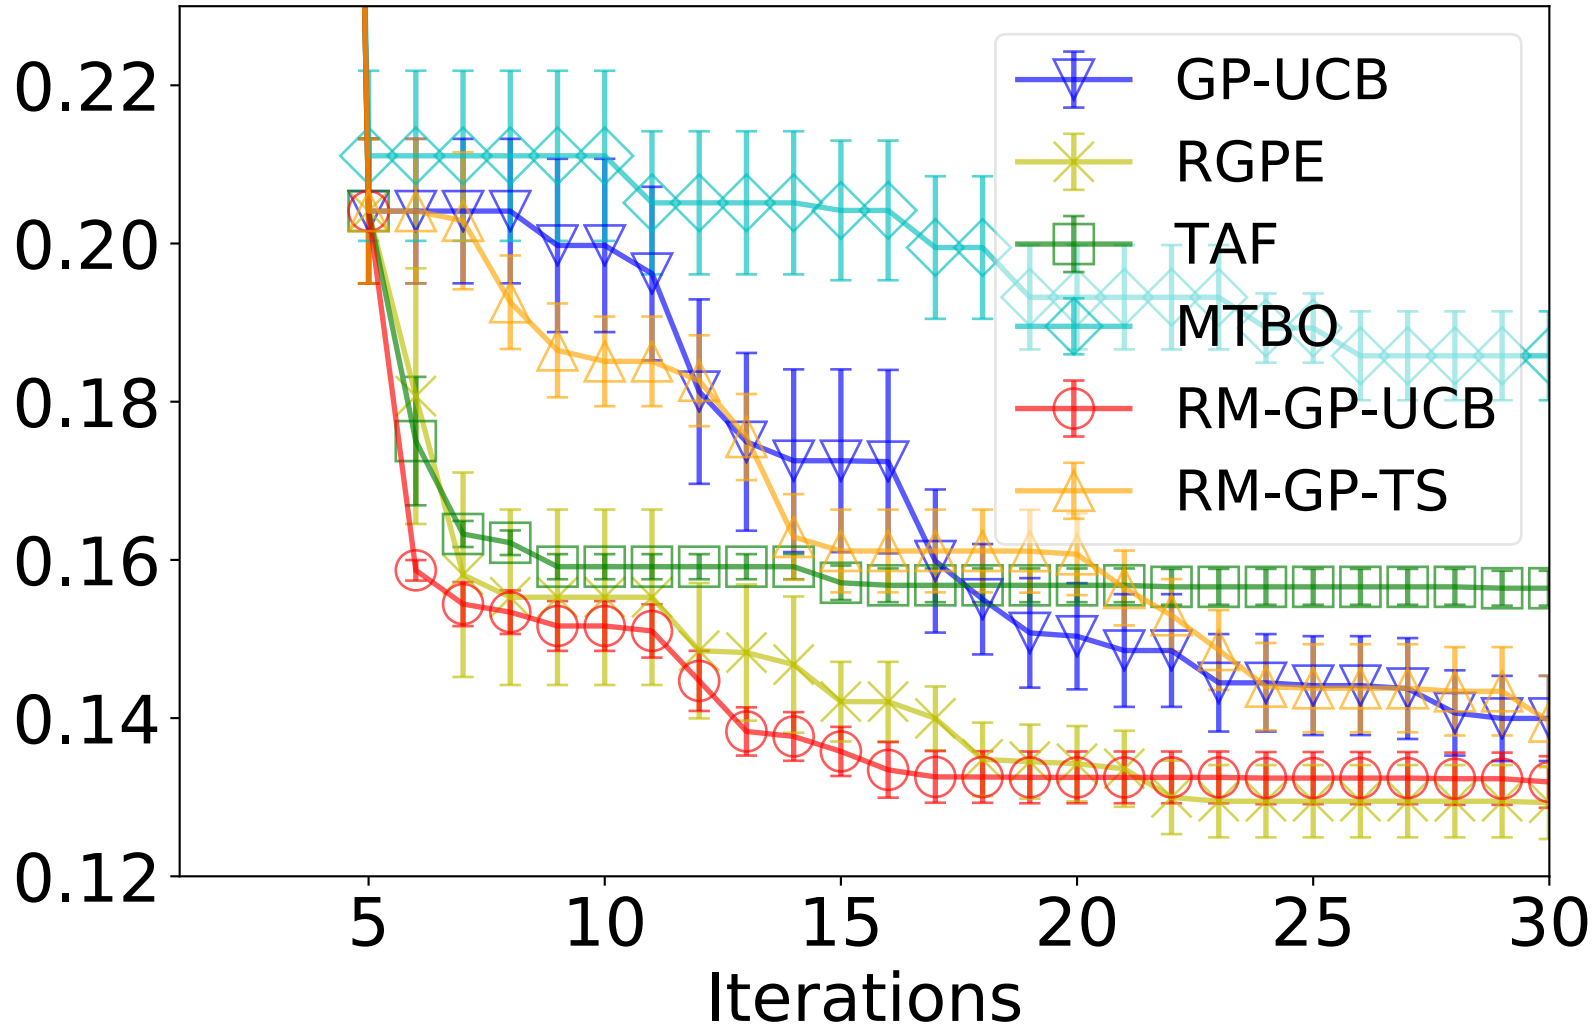

Supplement: supplementary_material [file attachment]

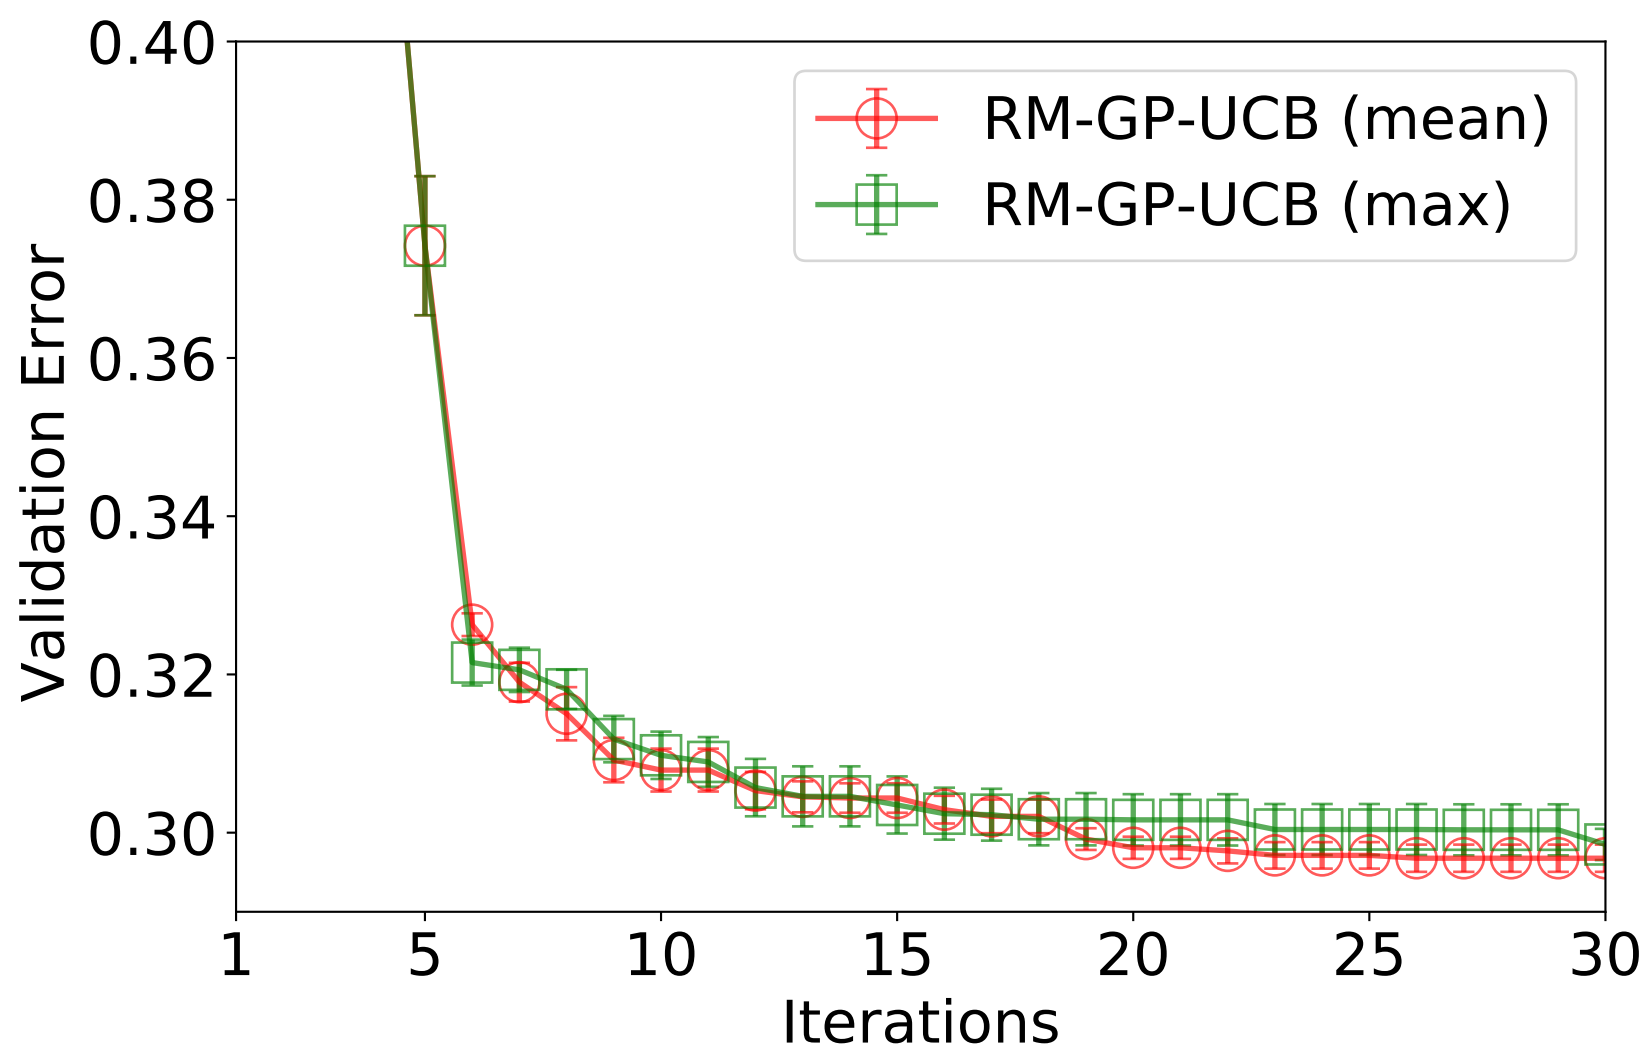

Supplement: supplementary_material [file attachment]

# RL (Large Scale)

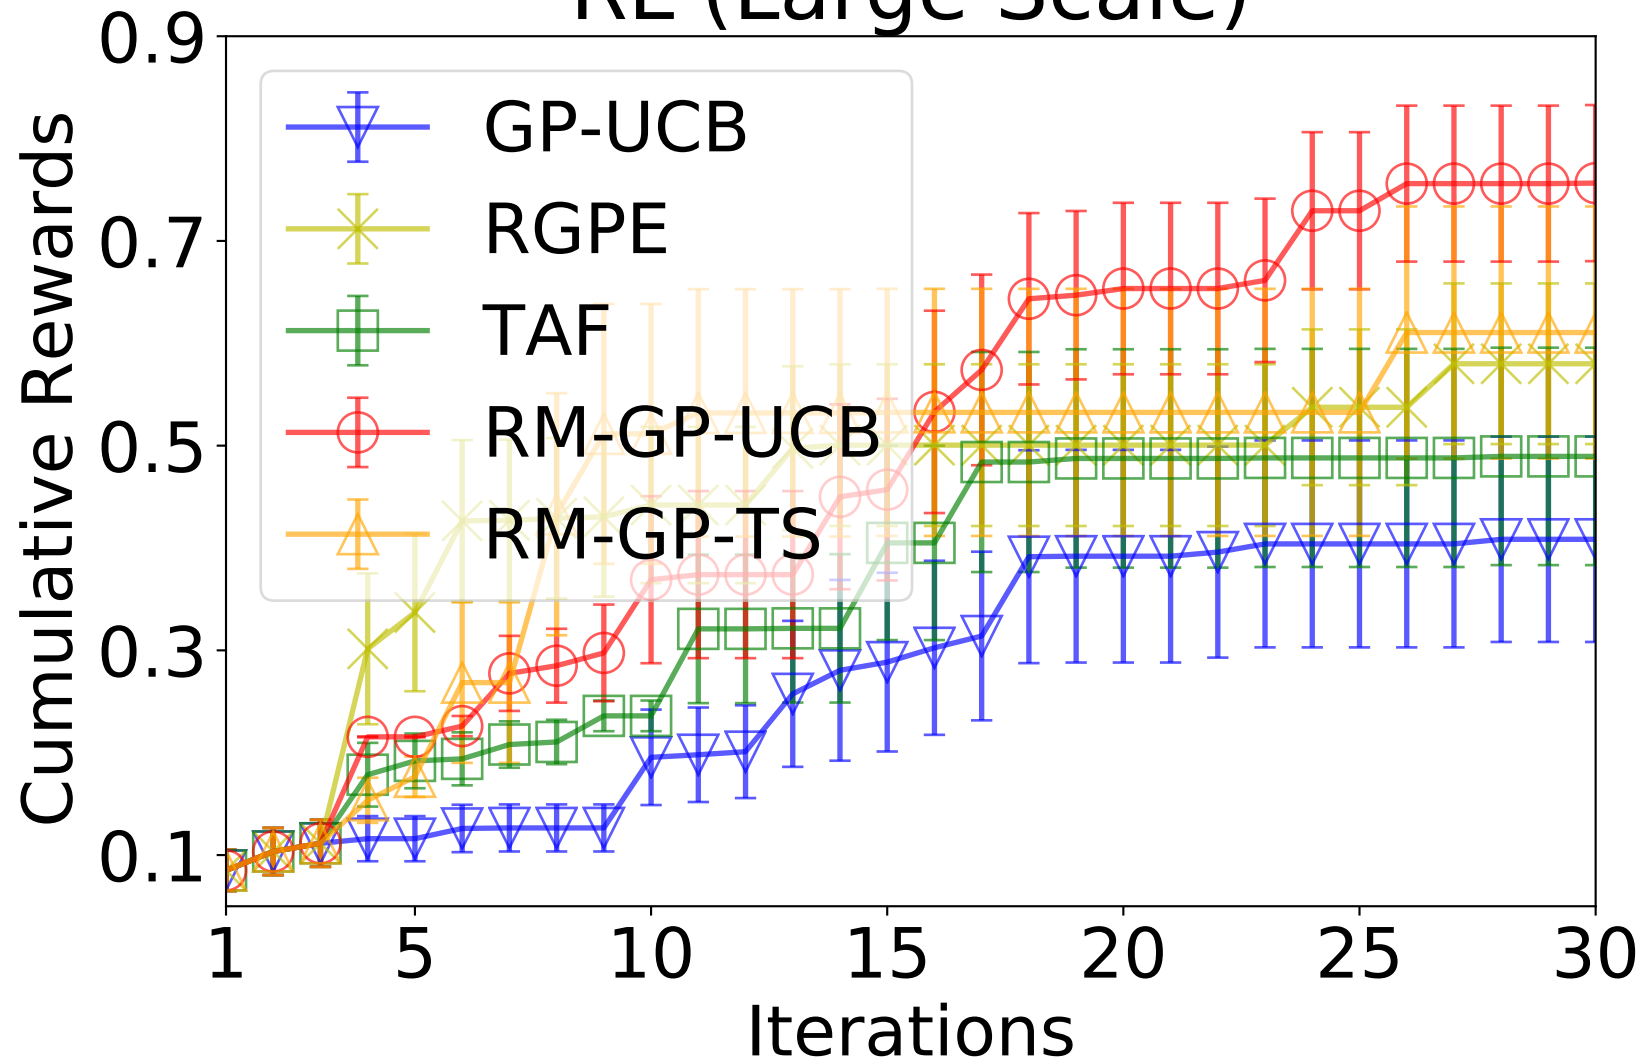

Supplement: supplementary_material [file attachment]

# Omniglot

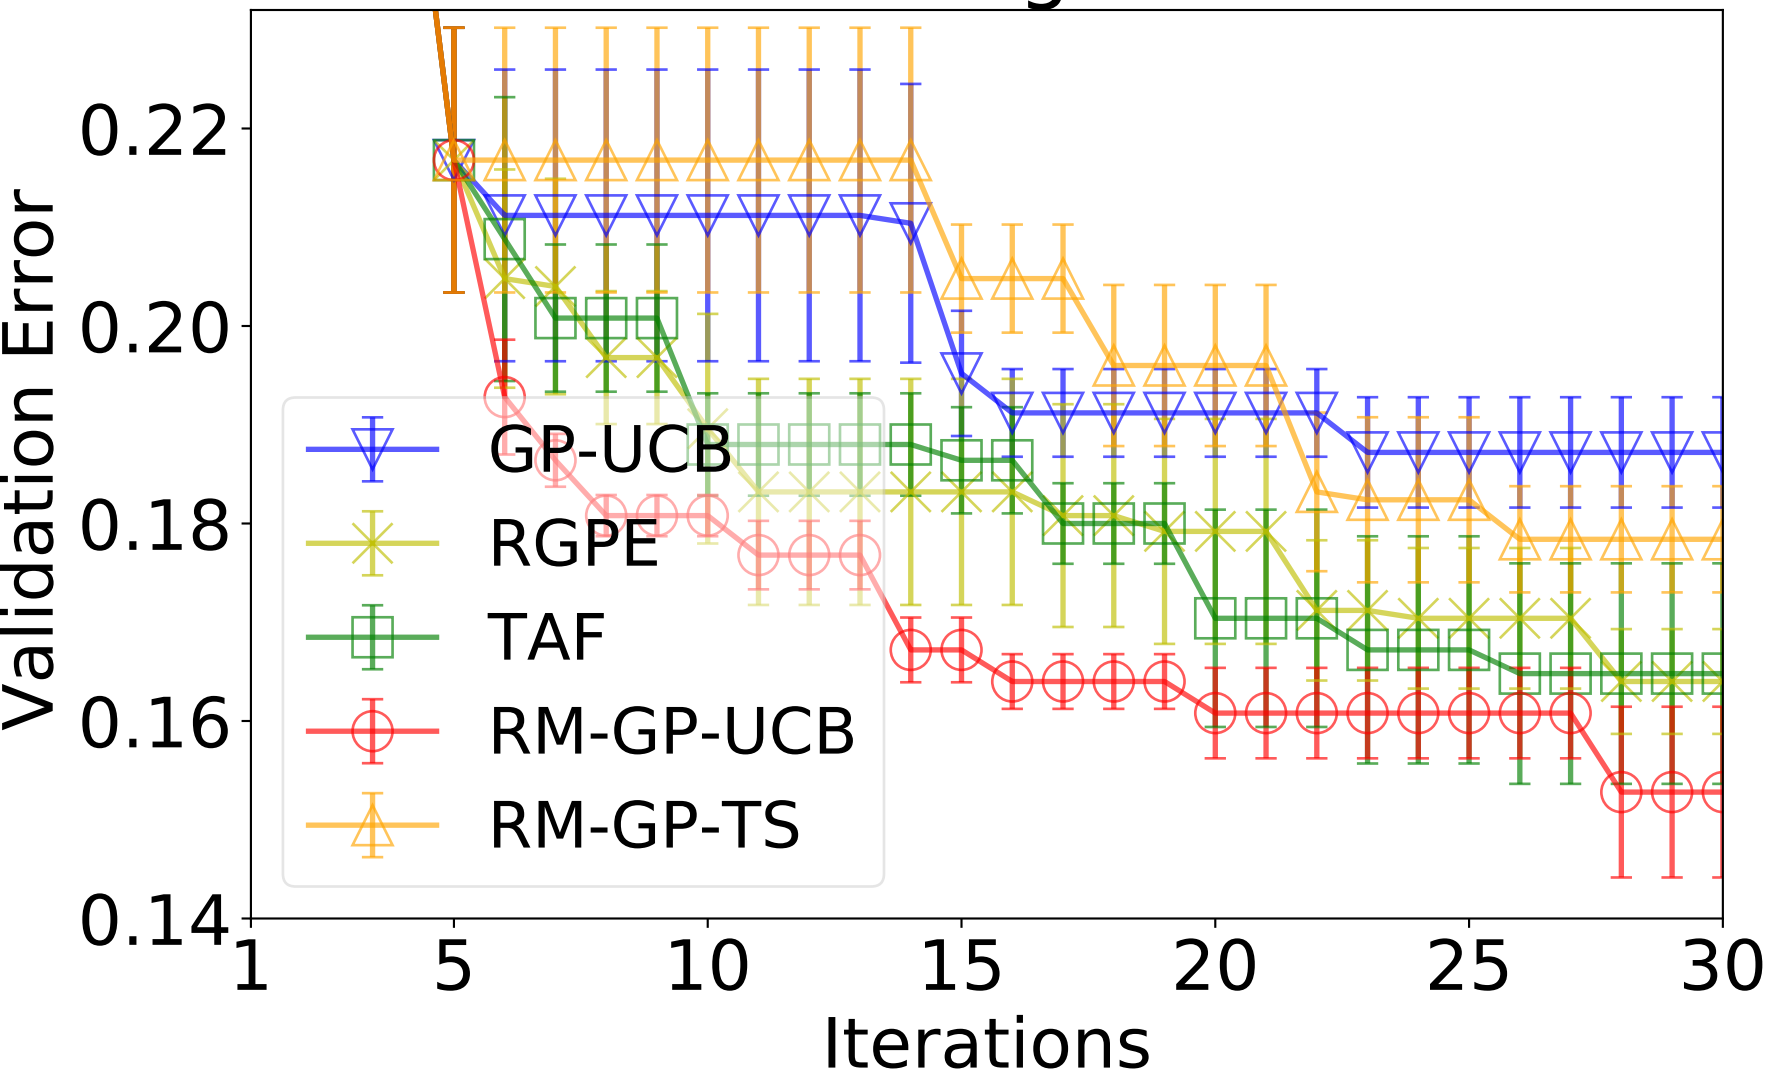

Supplement: supplementary_material [file attachment]

Validation Error

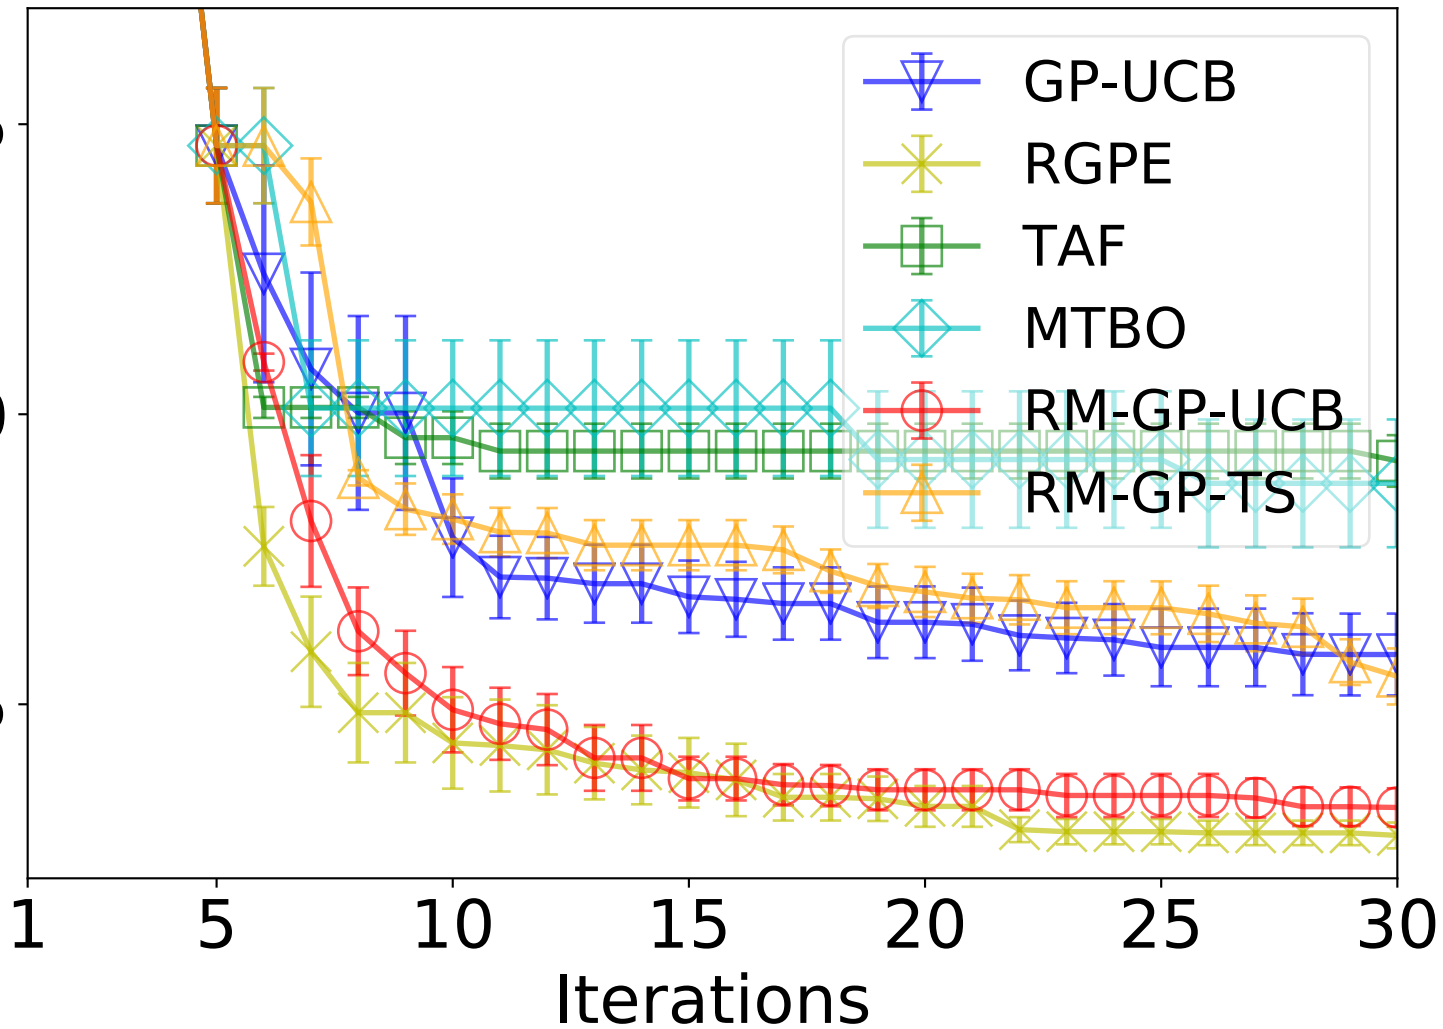

Supplement: supplementary_material [file attachment]
